# Supplementary material
Source: HighWire-hosted journal article supplement (https://www.ajevonline.org/content/suppl/2026/01/02/77.1.0770001)
Supplement: 25-017_SupplementalData.pdf [file 25-017_SupplementalData.pdf]

## Supplemental Data for:

Previtali P, Giorgini F, Sanchez LA and Dokoozlian NK. 2026. Long-term weather observations reveal the impact of heatwaves on the yield and fruit composition of Cabernet Sauvignon. *Am J Enol Vitic* 77:0770001. DOI: 10.5344/ajev.2025.25017

**Supplemental Table 1** List of summary features extracted from PRISM long-term weather observations. GDD, growing degree day;  $T_{max}$ , maximum temperature; HWU, heatwave units; DOY, day of year;  $T_{mean}$ , mean temperature;  $T_{min}$ , minimum temperature; VPD, vapor pressure deficit.

| Feature number | Feature name | Short description                          |
|----------------|--------------|--------------------------------------------|
| 1              | GDD_march    | Sum of GDD in March                        |
| 2              | GDD_april    | Sum of GDD in April                        |
| 3              | GDD_may      | Sum of GDD in May                          |
| 4              | GDD_june     | Sum of GDD in June                         |
| 5              | GDD_july     | Sum of GDD in July                         |
| 6              | GDD_aug      | Sum of GDD in August                       |
| 7              | GDD_sep      | Sum of GDD in September                    |
| 8              | GDD_oct      | Sum of GDD in October                      |
| 9              | GDD_preV     | Sum of GDD May to July                     |
| 10             | GDD_postV    | Sum of GDD August to October               |
| 11             | GDD_Apr_Oct  | Seasonal GDD (April to October)            |
| 12             | Tmax_jan     | $T_{max}$ in January                       |
| 13             | Tmax_feb     | $T_{max}$ in February                      |
| 14             | Tmax_march   | $T_{max}$ in March                         |
| 15             | Tmax_april   | $T_{max}$ in April                         |
| 16             | Tmax_may     | $T_{max}$ in May                           |
| 17             | Tmax_june    | $T_{max}$ in June                          |
| 18             | Tmax_july    | $T_{max}$ in July                          |
| 19             | Tmax_aug     | $T_{max}$ in August                        |
| 20             | Tmax_sep     | $T_{max}$ in September                     |
| 21             | Tmax_oct     | $T_{max}$ in October                       |
| 22             | Tmax_nov     | $T_{max}$ in November                      |
| 23             | Tmax_dec     | $T_{max}$ in December                      |
| 24             | Tmax_preV    | $T_{max}$ May to July                      |
| 25             | Tmax_postV   | $T_{max}$ Aug to Oct                       |
| 26             | Tmax_Apr_Oct | Seasonal $T_{max}$ (April to October)      |
| 27             | Tmax_doy     | DOY with $T_{max}$                         |
| 28             | HWU_may      | Sum of HWU in May                          |
| 29             | HWU_june     | Sum of HWU in June                         |
| 30             | HWU_july     | Sum of HWU in July                         |
| 31             | HWU_aug      | Sum of HWU in August                       |
| 32             | HWU_sep      | Sum of HWU in September                    |
| 33             | HWU_preV     | Sum of HWU May to July                     |
| 34             | HWU_postV    | Sum of HWU August to October               |
| 35             | HWU_Apr_Oct  | Seasonal HWU (April to October)            |
| 36             | ppt_jan      | Precipitation in January                   |
| 37             | ppt_feb      | Precipitation in February                  |
| 38             | ppt_march    | Precipitation in March                     |
| 39             | ppt_april    | Precipitation in April                     |
| 40             | ppt_may      | Precipitation in May                       |
| 41             | ppt_june     | Precipitation in June                      |
| 42             | ppt_july     | Precipitation in July                      |
| 43             | ppt_aug      | Precipitation in August                    |
| 44             | ppt_sep      | Precipitation in September                 |
| 45             | ppt_oct      | Precipitation in October                   |
| 46             | ppt_nov      | Precipitation in November                  |
| 47             | ppt_dec      | Precipitation in December                  |
| 48             | ppt_preS     | Preseason precipitation (January to March) |
| 49             | ppt_preV     | Precipitation May to July                  |
| 50             | ppt_postV    | Precipitation August to October            |

*Continued on next page.*

## Supplemental Data for:

Previtali P, Giorgini F, Sanchez LA and Dokoozlian NK. 2026. Long-term weather observations reveal the impact of heatwaves on the yield and fruit composition of Cabernet Sauvignon. *Am J Enol Vitic* 77:0770001. DOI: 10.5344/ajev.2025.25017

**Supplemental Table 1 *continued*** List of summary features extracted from PRISM long-term weather observations. GDD, growing degree day;  $T_{max}$ , maximum temperature; HWU, heatwave units; DOY, day of year;  $T_{mean}$ , mean temperature;  $T_{min}$ , minimum temperature; VPD, vapor pressure deficit.

| Feature number | Feature name  | Short description                         |
|----------------|---------------|-------------------------------------------|
| 51             | ppt_Apr_Oct   | Seasonal precipitation (April to October) |
| 52             | ppt_max_doy   | DOY with max precipitation                |
| 53             | tmean_jan     | $T_{mean}$ in January                     |
| 54             | tmean_feb     | $T_{mean}$ in February                    |
| 55             | tmean_march   | $T_{mean}$ in March                       |
| 56             | tmean_apr     | $T_{mean}$ in April                       |
| 57             | tmean_may     | $T_{mean}$ in May                         |
| 58             | tmean_june    | $T_{mean}$ in June                        |
| 59             | tmean_july    | $T_{mean}$ in July                        |
| 60             | tmean_aug     | $T_{mean}$ in August                      |
| 61             | tmean_sep     | $T_{mean}$ in September                   |
| 62             | tmean_oct     | $T_{mean}$ in October                     |
| 63             | tmean_nov     | $T_{mean}$ in November                    |
| 64             | tmean_dec     | $T_{mean}$ in December                    |
| 65             | tmean_preS    | $T_{mean}$ May to July                    |
| 66             | tmean_preV    | $T_{mean}$ August to Oct                  |
| 67             | tmean_postV   | Seasonal $T_{mean}$ (April to October)    |
| 68             | tmean_Apr_Oct | DOY with $T_{mean}$                       |
| 69             | tmin_jan      | $T_{min}$ in January                      |
| 70             | tmin_feb      | $T_{min}$ in February                     |
| 71             | tmin_march    | $T_{min}$ in March                        |
| 72             | tmin_apr      | $T_{min}$ in April                        |
| 73             | tmin_may      | $T_{min}$ in May                          |
| 74             | tmin_june     | $T_{min}$ in June                         |
| 75             | tmin_july     | $T_{min}$ in July                         |
| 76             | tmin_aug      | $T_{min}$ in August                       |
| 77             | tmin_sep      | $T_{min}$ in September                    |
| 78             | tmin_oct      | $T_{min}$ in October                      |
| 79             | tmin_nov      | $T_{min}$ in November                     |
| 80             | tmin_dec      | $T_{min}$ in December                     |
| 81             | tmin_preS     | $T_{min}$ preseason (January to March)    |
| 82             | tmin_preV     | $T_{min}$ May to July                     |
| 83             | tmin_postV    | $T_{min}$ August to October               |
| 84             | tmin_Apr_Oct  | Seasonal $T_{min}$ (April to October)     |
| 85             | fdays_jan     | Frost days in January                     |
| 86             | fdays_feb     | Frost days in February                    |
| 87             | fdays_mar     | Frost days in March                       |
| 88             | fdays_apr     | Frost days in April                       |
| 89             | fdays_may     | Frost days in May                         |
| 90             | fdays_oct     | Frost days in October                     |
| 91             | fdays_nov     | Frost days in November                    |
| 92             | fdays_dec     | Frost days in December                    |
| 93             | fdays_Apr_Oct | Seasonal frost days (April to October)    |
| 94             | frost_jan     | Frost degrees in January                  |
| 95             | frost_feb     | Frost degrees in February                 |
| 96             | frost_march   | Frost degrees in March                    |
| 97             | frost_apr     | Frost degrees in April                    |
| 98             | frost_may     | Frost degrees in May                      |
| 99             | frost_nov     | Frost degrees in November                 |

*Continued on next page.*

## Supplemental Data for:

Previtali P, Giorgini F, Sanchez LA and Dokoozlian NK. 2026. Long-term weather observations reveal the impact of heatwaves on the yield and fruit composition of Cabernet Sauvignon. *Am J Enol Vitic* 77:0770001. DOI: 10.5344/ajev.2025.25017

**Supplemental Table 1 *continued*** List of summary features extracted from PRISM long-term weather observations. GDD, growing degree day;  $T_{max}$ , maximum temperature; HWU, heatwave units; DOY, day of year;  $T_{mean}$ , mean temperature;  $T_{min}$ , minimum temperature; VPD, vapor pressure deficit.

| Feature number | Feature name    | Short description                     |
|----------------|-----------------|---------------------------------------|
| 100            | frost_dec       | Frost degrees in December             |
| 101            | vpdmin_jan      | Min VPD in January                    |
| 102            | vpdmin_feb      | Min VPD in February                   |
| 103            | vpdmin_march    | Min VPD in March                      |
| 104            | vpdmin_apr      | Min VPD in April                      |
| 105            | vpdmin_may      | Min VPD in May                        |
| 106            | vpdmin_june     | Min VPD in June                       |
| 107            | vpdmin_july     | Min VPD in July                       |
| 108            | vpdmin_aug      | Min VPD in August                     |
| 109            | vpdmin_sep      | Min VPD in September                  |
| 110            | vpdmin_oct      | Min VPD in October                    |
| 111            | vpdmin_nov      | Min VPD in November                   |
| 112            | vpdmin_dec      | Min VPD in December                   |
| 113            | vpdmin_preV     | Min VPD (April to July)               |
| 114            | vpdmin_postV    | Min VPD (August to Oct)               |
| 115            | vpdmin_Apr_Oct  | Seasonal Min VPD (April to October)   |
| 116            | vpdmax_jan      | Max VPD in January                    |
| 117            | vpdmax_feb      | Max VPD in February                   |
| 118            | vpdmax_march    | Max VPD in March                      |
| 119            | vpdmax_apr      | Max VPD in April                      |
| 120            | vpdmax_may      | Max VPD in May                        |
| 121            | vpdmax_june     | Max VPD in June                       |
| 122            | vpdmax_july     | Max VPD in July                       |
| 123            | vpdmax_aug      | Max VPD in August                     |
| 124            | vpdmax_sep      | Max VPD in September                  |
| 125            | vpdmax_oct      | Max VPD in October                    |
| 126            | vpdmax_nov      | Max VPD in November                   |
| 127            | vpdmax_dec      | Max VPD in December                   |
| 128            | vpdmax_preV     | Max VPD (April to July)               |
| 129            | vpdmax_postV    | Max VPD (August to October)           |
| 130            | vpdmax_Apr_Oct  | Seasonal Min VPD (April to October)   |
| 131            | heat_days_100   | Heat days base 38°C                   |
| 132            | heat_days_june  | Heat days in June                     |
| 133            | heat_days_july  | Heat days in July                     |
| 134            | heat_days_aug   | Heat days in August                   |
| 135            | heat_days_sep   | Heat days in September                |
| 136            | heat_days_preV  | Heat days May to July                 |
| 137            | heat_days_postV | Heat days August to October           |
| 138            | no_hw_june      | Number of heatwaves in June           |
| 139            | no_hw_july      | Number of heatwaves in July           |
| 140            | no_hw_aug       | Number of heatwaves in August         |
| 141            | no_hw_sep       | Number of heatwaves in September      |
| 142            | no_hw_preV      | Number of heatwaves May to July       |
| 143            | no_hw_postV     | Number of heatwaves August to October |
| 144            | no_hw           | Seasonal number of heatwaves          |
| 145            | avg_hw_duration | Average heatwave duration (days)      |
| 146            | max_hw_duration | Maximum heatwave duration (days)      |
| 147            | tot_hw_hwu      | Total heatwave HWU                    |
| 148            | avg_hw_hwu      | Average heatwave HWU                  |

*Continued on next page.*

## Supplemental Data for:

Previtali P, Giorgini F, Sanchez LA and Dokoozlian NK. 2026. Long-term weather observations reveal the impact of heatwaves on the yield and fruit composition of Cabernet Sauvignon. *Am J Enol Vitic* 77:0770001. DOI: 10.5344/ajev.2025.25017

**Supplemental Table 1 *continued*** List of summary features extracted from PRISM long-term weather observations. GDD, growing degree day;  $T_{max}$ , maximum temperature; HWU, heatwave units; DOY, day of year;  $T_{mean}$ , mean temperature;  $T_{min}$ , minimum temperature; VPD, vapor pressure deficit.

| Feature number | Feature name   | Short description                          |
|----------------|----------------|--------------------------------------------|
| 149            | avg_hw_vpd     | Average heatwave VPD                       |
| 150            | max_hw_vpd     | Maximum heatwave VPD                       |
| 151            | hw_hwu_june    | Heatwave HWU in June                       |
| 152            | hw_hwu_july    | Heatwave HWU in July                       |
| 153            | hw_hwu_aug     | Heatwave HWU in August                     |
| 154            | hw_hwu_sep     | Heatwave HWU in September                  |
| 155            | hw_hwu_preV    | Heatwave HWU May to July                   |
| 156            | hw_hwu_postV   | Heatwave HWU August to October             |
| 157            | Tmax_BBtoBL    | $T_{max}$ from budbreak to bloom           |
| 158            | Tmax_BLtoVER   | $T_{max}$ from bloom to veraison           |
| 159            | Tmax_VERtoH    | $T_{max}$ from veraison to harvest         |
| 160            | Tmax_BBtoH     | $T_{max}$ from budbreak to harvest         |
| 161            | Tmean_BBtoBL   | $T_{mean}$ from budbreak to bloom          |
| 162            | Tmean_BLtoVER  | $T_{mean}$ from bloom to veraison          |
| 163            | Tmean_VERtoH   | $T_{mean}$ from veraison to harvest        |
| 164            | Tmean_BBtoH    | $T_{mean}$ from budbreak to harvest        |
| 165            | Tmin_BBtoBL    | $T_{min}$ from budbreak to bloom           |
| 166            | Tmin_BLtoVER   | $T_{min}$ from bloom to veraison           |
| 167            | Tmin_VERtoH    | $T_{min}$ from veraison to harvest         |
| 168            | Tmin_BBtoH     | $T_{min}$ from budbreak to harvest         |
| 169            | rain_BBtoBL    | Precipitation from budbreak to bloom       |
| 170            | rain_BLtoVER   | Precipitation from bloom to veraison       |
| 171            | rain_VERtoH    | Precipitation from veraison to harvest     |
| 172            | rain_BBtoH     | Precipitation from budbreak to harvest     |
| 173            | fdays_BBtoBL   | Frost days from budbreak to bloom          |
| 174            | fdays_BLtoVER  | Frost days from bloom to veraison          |
| 175            | fdays_VERtoH   | Frost days from veraison to harvest        |
| 176            | fdays_BBtoH    | Frost days from budbreak to harvest        |
| 177            | frost_BBtoBL   | Frost degrees from budbreak to bloom       |
| 178            | frost_BLtoVER  | Frost degrees from bloom to veraison       |
| 179            | frost_VERtoH   | Frost degrees from veraison to harvest     |
| 180            | frost_BBtoH    | Frost degrees from budbreak to harvest     |
| 181            | hwu_BBtoBL     | HWU from budbreak to bloom                 |
| 182            | hwu_BLtoVER    | HWU from bloom to veraison                 |
| 183            | hwu_VERtoH     | HWU from veraison to harvest               |
| 184            | hwu_BBtoH      | HWU from budbreak to harvest               |
| 185            | vpdmax_BBtoBL  | $VPD_{max}$ from budbreak to bloom         |
| 186            | vpdmax_BLtoVER | $VPD_{max}$ from bloom to veraison         |
| 187            | vpdmax_VERtoH  | $VPD_{max}$ from veraison to harvest       |
| 188            | vpdmax_BBtoH   | $VPD_{max}$ from budbreak to harvest       |
| 189            | vpdavg_BBtoBL  | $VPD_{avg}$ from budbreak to bloom         |
| 190            | vpdavg_BLtoVER | $VPD_{avg}$ from bloom to veraison         |
| 191            | vpdavg_VERtoH  | $VPD_{avg}$ from veraison to harvest       |
| 192            | vpdavg_BBtoH   | $VPD_{avg}$ from budbreak to harvest       |
| 193            | vpdmin_BBtoBL  | $VPD_{min}$ from budbreak to bloom         |
| 194            | vpdmin_BLtoVER | $VPD_{min}$ from bloom to veraison         |
| 195            | vpdmin_VERtoH  | $VPD_{min}$ from veraison to harvest       |
| 196            | vpdmin_BBtoH   | $VPD_{min}$ from budbreak to harvest       |
| 197            | no_hw_BLtoVER  | Number of heatwaves from bloom to veraison |

*Continued on next page.*

## Supplemental Data for:

Previtali P, Giorgini F, Sanchez LA and Dokoozlian NK. 2026. Long-term weather observations reveal the impact of heatwaves on the yield and fruit composition of Cabernet Sauvignon. *Am J Enol Vitic* 77:0770001. DOI: 10.5344/ajev.2025.25017

**Supplemental Table 1 *continued*** List of summary features extracted from PRISM long-term weather observations. GDD, growing degree day;  $T_{max}$ , maximum temperature; HWU, heatwave units; DOY, day of year;  $T_{mean}$ , mean temperature;  $T_{min}$ , minimum temperature; VPD, vapor pressure deficit.

| Feature number | Feature name            | Short description                                  |
|----------------|-------------------------|----------------------------------------------------|
| 198            | no_hw_VERtoH            | Number of heatwaves from veraison to harvest       |
| 199            | no_hw_BBtoH             | Number of heatwaves from budbreak to harvest       |
| 200            | avg_hw_duration_BLtoVER | Average heatwave duration from bloom to veraison   |
| 201            | avg_hw_duration_VERtoH  | Average heatwave duration from veraison to harvest |
| 202            | avg_hw_duration_BBtoH   | Average heatwave duration from budbreak to harvest |
| 203            | max_hw_duration_BLtoVER | Maximum heatwave duration from bloom to veraison   |
| 204            | max_hw_duration_VERtoH  | Maximum heatwave duration from veraison to harvest |
| 205            | max_hw_duration_BBtoH   | Maximum heatwave duration from budbreak to harvest |
| 206            | tot_hw_hwu_BLtoVER      | Total heatwave HWU from bloom to veraison          |
| 207            | tot_hw_hwu_VERtoH       | Total heatwave HWU from veraison to harvest        |
| 208            | tot_hw_hwu_BBtoH        | Total heatwave HWU from budbreak to harvest        |
| 209            | avg_hw_hwu_BLtoVER      | Average heatwave HWU from bloom to veraison        |
| 210            | avg_hw_hwu_VERtoH       | Average heatwave HWUs from veraison to harvest     |
| 211            | avg_hw_hwu_BBtoH        | Average heatwave HWUs from budbreak to harvest     |
| 212            | avg_hw_vpd_BLtoVER      | Average heatwave VPD from bloom to veraison        |
| 213            | avg_hw_vpd_VERtoH       | Average heatwave VPD from veraison to harvest      |
| 214            | avg_hw_vpd_BBtoH        | Average heatwave VPD from budbreak to harvest      |
| 215            | max_hw_vpd_BLtoVER      | Maximum heatwave VPD from bloom to veraison        |
| 216            | max_hw_vpd_VERtoH       | Maximum heatwave VPD from veraison to harvest      |
| 217            | max_hw_vpd_BBtoH        | Maximum heatwave VPD from budbreak to harvest      |
| 218            | heat_days_BLtoVER       | Number of heat days from bloom to veraison         |
| 219            | heat_days_VERtoH        | Number of heat days from veraison to harvest       |
| 220            | heat_days_BBtoH         | Number of heat days from budbreak to harvest       |

## Supplemental Data for:

Previtali P, Giorgini F, Sanchez LA and Dokoozlian NK. 2026. Long-term weather observations reveal the impact of heatwaves on the yield and fruit composition of Cabernet Sauvignon. *Am J Enol Vitic* 77:0770001. DOI: 10.5344/ajev.2025.25017

|                                                                                                                                                                                                                                                                                                                                                                                                                                                                                                                                                                                                                                                                                                                                                                  | <b>C1</b>           | <b>C2</b>           | <b>C3</b>             | <b>p value</b>    | <b>C1-C2</b>      | <b>C1-C3</b>      | <b>C2-C3</b>      |
|------------------------------------------------------------------------------------------------------------------------------------------------------------------------------------------------------------------------------------------------------------------------------------------------------------------------------------------------------------------------------------------------------------------------------------------------------------------------------------------------------------------------------------------------------------------------------------------------------------------------------------------------------------------------------------------------------------------------------------------------------------------|---------------------|---------------------|-----------------------|-------------------|-------------------|-------------------|-------------------|
| <b>Supplemental Table 2</b> Statistical outputs of harvest date, yield, and fruit composition parameters by cluster (C1, cluster 1, postveraison heat; C2, cluster 2, preveraison heat; C3, cluster 3, cool season). <i>P</i> values of cluster effects were computed using linear mixed models (fixed effect: cluster; random effect: vineyard block ID). Data by cluster are presented as means ± 95% confidence intervals and different letters denote significant differences between means according to Tukey's adjusted post-hoc test at $p \leq 0.05$ . Significant <i>p</i> values (i.e., $\leq 0.05$ ) are marked in bold formatting. DOY, day of year; TSS, total soluble solids; YAN, yeast assimilable nitrogen; IBMP, 3-isobutyl-2-methoxypyrazine. |                     |                     |                       |                   |                   |                   |                   |
| <b>Vineyard performance</b>                                                                                                                                                                                                                                                                                                                                                                                                                                                                                                                                                                                                                                                                                                                                      |                     |                     |                       |                   |                   |                   |                   |
| Harvest date (DOY)                                                                                                                                                                                                                                                                                                                                                                                                                                                                                                                                                                                                                                                                                                                                               | 274 (272-275) c     | 277 (276-279) b     | 291 (290-292) a       | <b>&lt;0.0001</b> | <b>&lt;0.0001</b> | <b>&lt;0.0001</b> | <b>&lt;0.0001</b> |
| Yield (tons/ha)                                                                                                                                                                                                                                                                                                                                                                                                                                                                                                                                                                                                                                                                                                                                                  | 5.48 (5.40-5.55) b  | 5.03 (4.95-5.11) c  | 6.97 (6.89-7.04) a    | <b>&lt;0.0001</b> | <b>0.0102</b>     | <b>&lt;0.0001</b> | <b>&lt;0.0001</b> |
| <b>Berry chemistry</b>                                                                                                                                                                                                                                                                                                                                                                                                                                                                                                                                                                                                                                                                                                                                           |                     |                     |                       |                   |                   |                   |                   |
| Berry moisture (%)                                                                                                                                                                                                                                                                                                                                                                                                                                                                                                                                                                                                                                                                                                                                               | 69.6 (69.5-69.6)    | 69.9 (69.8-70.0)    | 69.8 (69.7-69.9)      | 0.299             | 0.3428            | 0.4232            | 0.9652            |
| TSS (Brix)                                                                                                                                                                                                                                                                                                                                                                                                                                                                                                                                                                                                                                                                                                                                                       | 26.4 (26.4-26.45) a | 26.0 (25.9-26.0) b  | 26.1 (26.0-26.1) b    | <b>0.0001</b>     | <b>0.0003</b>     | <b>0.0023</b>     | 0.6664            |
| pH                                                                                                                                                                                                                                                                                                                                                                                                                                                                                                                                                                                                                                                                                                                                                               | 3.65 (3.65-3.65) a  | 3.57 (3.56-3.57) c  | 3.61 (3.61-3.62) b    | <b>&lt;0.0001</b> | <b>&lt;0.0001</b> | <b>&lt;0.0001</b> | <b>&lt;0.0001</b> |
| Malic acid (mg/L)                                                                                                                                                                                                                                                                                                                                                                                                                                                                                                                                                                                                                                                                                                                                                | 1995 (1980-2011) a  | 1341 (1324-1359) b  | 1349 (1333-1364) b    | <b>&lt;0.0001</b> | <b>&lt;0.0001</b> | <b>&lt;0.0001</b> | <b>0.9841</b>     |
| YAN (mg/L)                                                                                                                                                                                                                                                                                                                                                                                                                                                                                                                                                                                                                                                                                                                                                       | 93.6 (92.4-94.9) b  | 65.6 (64.1- 67.0) c | 123.8 (122.6-125.0) a | <b>&lt;0.0001</b> | <b>&lt;0.0001</b> | <b>&lt;0.0001</b> | <b>&lt;0.0001</b> |
| <b>Phenolic compounds</b>                                                                                                                                                                                                                                                                                                                                                                                                                                                                                                                                                                                                                                                                                                                                        |                     |                     |                       |                   |                   |                   |                   |
| Total anthocyanins (mg/g)                                                                                                                                                                                                                                                                                                                                                                                                                                                                                                                                                                                                                                                                                                                                        | 1.50 (1.49-1.51) c  | 1.85 (1.84-1.86) a  | 1.75 (1.74-1.76) b    | <b>&lt;0.0001</b> | <b>&lt;0.0001</b> | <b>&lt;0.0001</b> | <b>&lt;0.0001</b> |
| Polymeric tannins (mg/L)                                                                                                                                                                                                                                                                                                                                                                                                                                                                                                                                                                                                                                                                                                                                         | 3856 (3837-3875) a  | 3447 (3426-3467) b  | 2979 (2961-2998) c    | <b>&lt;0.0001</b> | <b>&lt;0.0001</b> | <b>&lt;0.0001</b> | <b>&lt;0.0001</b> |
| Quercetin glycosides (mg/L)                                                                                                                                                                                                                                                                                                                                                                                                                                                                                                                                                                                                                                                                                                                                      | 118 (117-119) b     | 146 (144-147) a     | 118 (117-120) b       | <b>&lt;0.0001</b> | <b>&lt;0.0001</b> | 0.9923            | <b>&lt;0.0001</b> |
| <b>Aroma compounds</b>                                                                                                                                                                                                                                                                                                                                                                                                                                                                                                                                                                                                                                                                                                                                           |                     |                     |                       |                   |                   |                   |                   |
| 1-Octen-3-ol (µg/L)                                                                                                                                                                                                                                                                                                                                                                                                                                                                                                                                                                                                                                                                                                                                              | 50.2 (49.5-50.9) a  | 27.8 (27.0-28.6) b  | 17.1 (16.4-17.7) c    | <b>&lt;0.0001</b> | <b>&lt;0.0001</b> | <b>&lt;0.0001</b> | <b>&lt;0.0001</b> |
| β-Damascenone (µg/L)                                                                                                                                                                                                                                                                                                                                                                                                                                                                                                                                                                                                                                                                                                                                             | 53.5 (53.2-53.8) b  | 52.7 (52.3-53.1) b  | 56.9 (56.6-57.2) a    | <b>&lt;0.0001</b> | 0.5893            | <b>&lt;0.0001</b> | <b>&lt;0.0001</b> |
| C6 compounds (µg/L)                                                                                                                                                                                                                                                                                                                                                                                                                                                                                                                                                                                                                                                                                                                                              | 5424 (5361-5488)    | 5353 (5197-5509)    | 5170 (5107-5233)      | 0.3712            | 0.859             | 0.3426            | 0.977             |
| IBMP (ng/L)                                                                                                                                                                                                                                                                                                                                                                                                                                                                                                                                                                                                                                                                                                                                                      | 2.71 (2.59-2.82) c  | 5.68 (5.55-5.81) a  | 4.14 (4.03-4.25) b    | <b>&lt;0.0001</b> | <b>&lt;0.0001</b> | <b>&lt;0.0001</b> | <b>&lt;0.0001</b> |

## Supplemental Data for:

Previtali P, Giorgini F, Sanchez LA and Dokoozlian NK. 2026. Long-term weather observations reveal the impact of heatwaves on the yield and fruit composition of Cabernet Sauvignon. *Am J Enol Vitic* 77:0770001. DOI: 10.5344/ajev.2025.25017

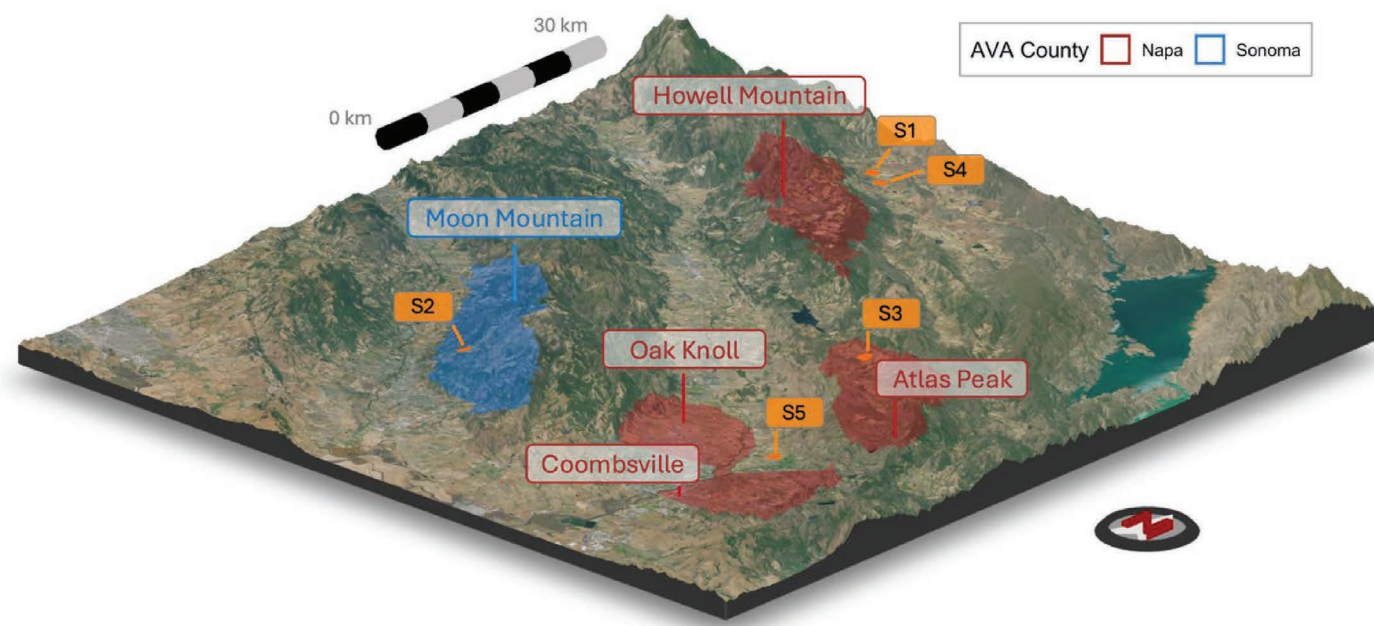

**Supplemental Figure 1** Map of vineyard site (S1 to S5) locations and closest American Viticultural Areas (AVA).

## Supplemental Data for:

Previtali P, Giorgini F, Sanchez LA and Dokoozlian NK. 2026. Long-term weather observations reveal the impact of heatwaves on the yield and fruit composition of Cabernet Sauvignon. *Am J Enol Vitic* 77:0770001. DOI: 10.5344/ajev.2025.25017

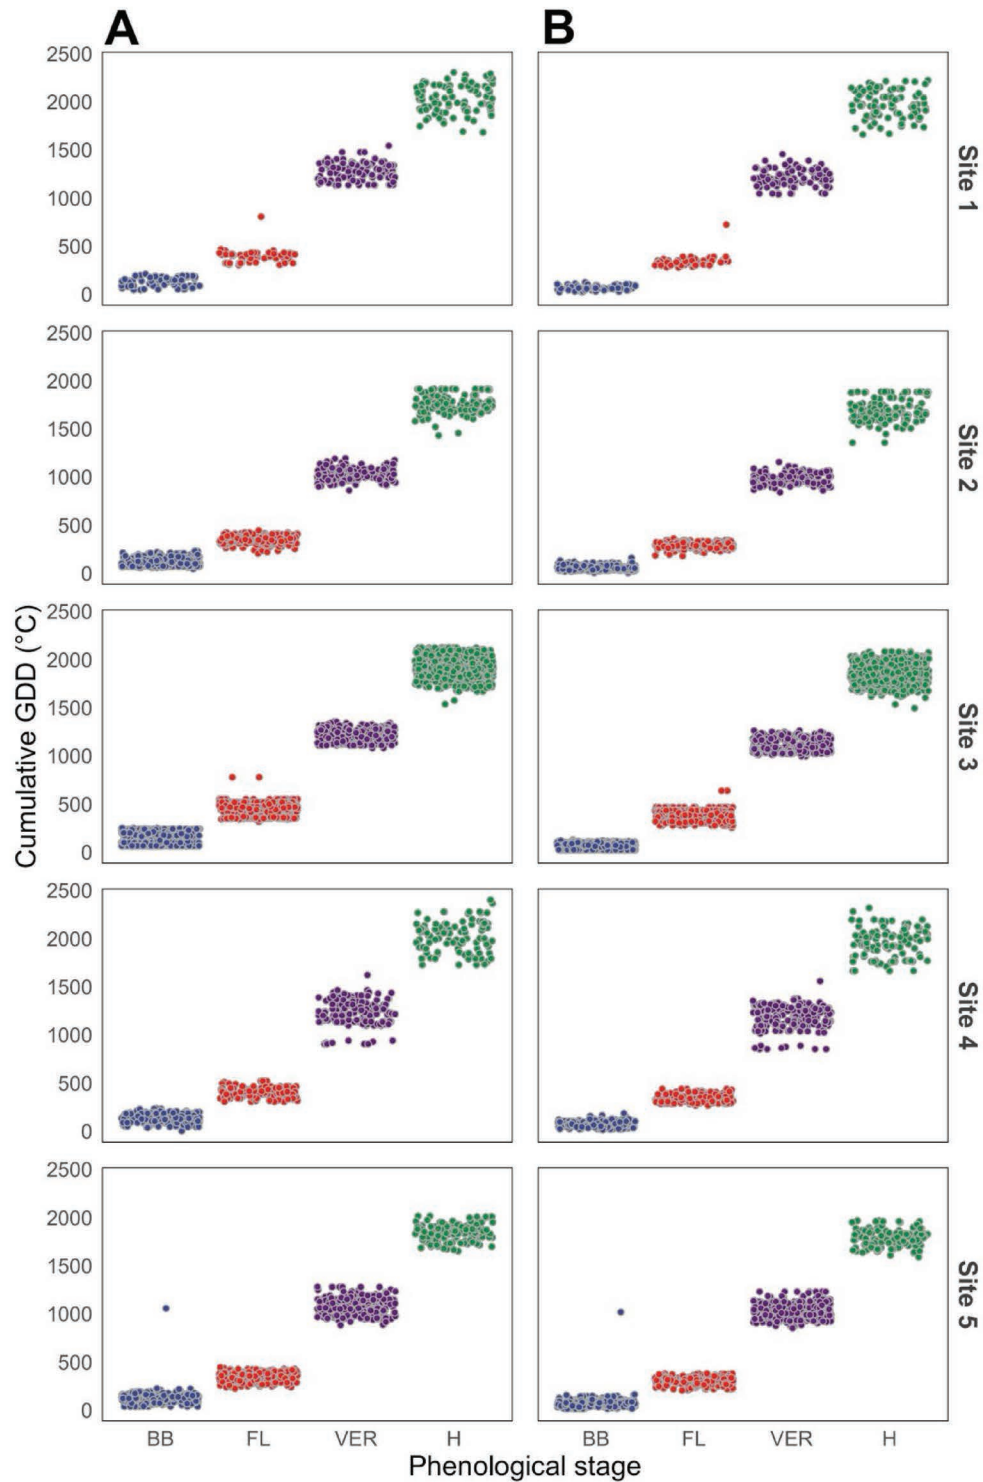

**Supplemental Figure 2** Relationships between observed phenological stages (BB, budbreak; FL, flowering; VER, veraison; H, harvest) and cumulative growing degree day (GDD) calculated from **A**) 1 January or **B**) 1 March. Cumulative GDD were calculated using PRISM daily data.

**Supplemental Data for:**

Previtali P, Giorgini F, Sanchez LA and Dokoozlian NK. 2026. Long-term weather observations reveal the impact of heatwaves on the yield and fruit composition of Cabernet Sauvignon. *Am J Enol Vitic* 77:0770001. DOI: 10.5344/ajev.2025.25017

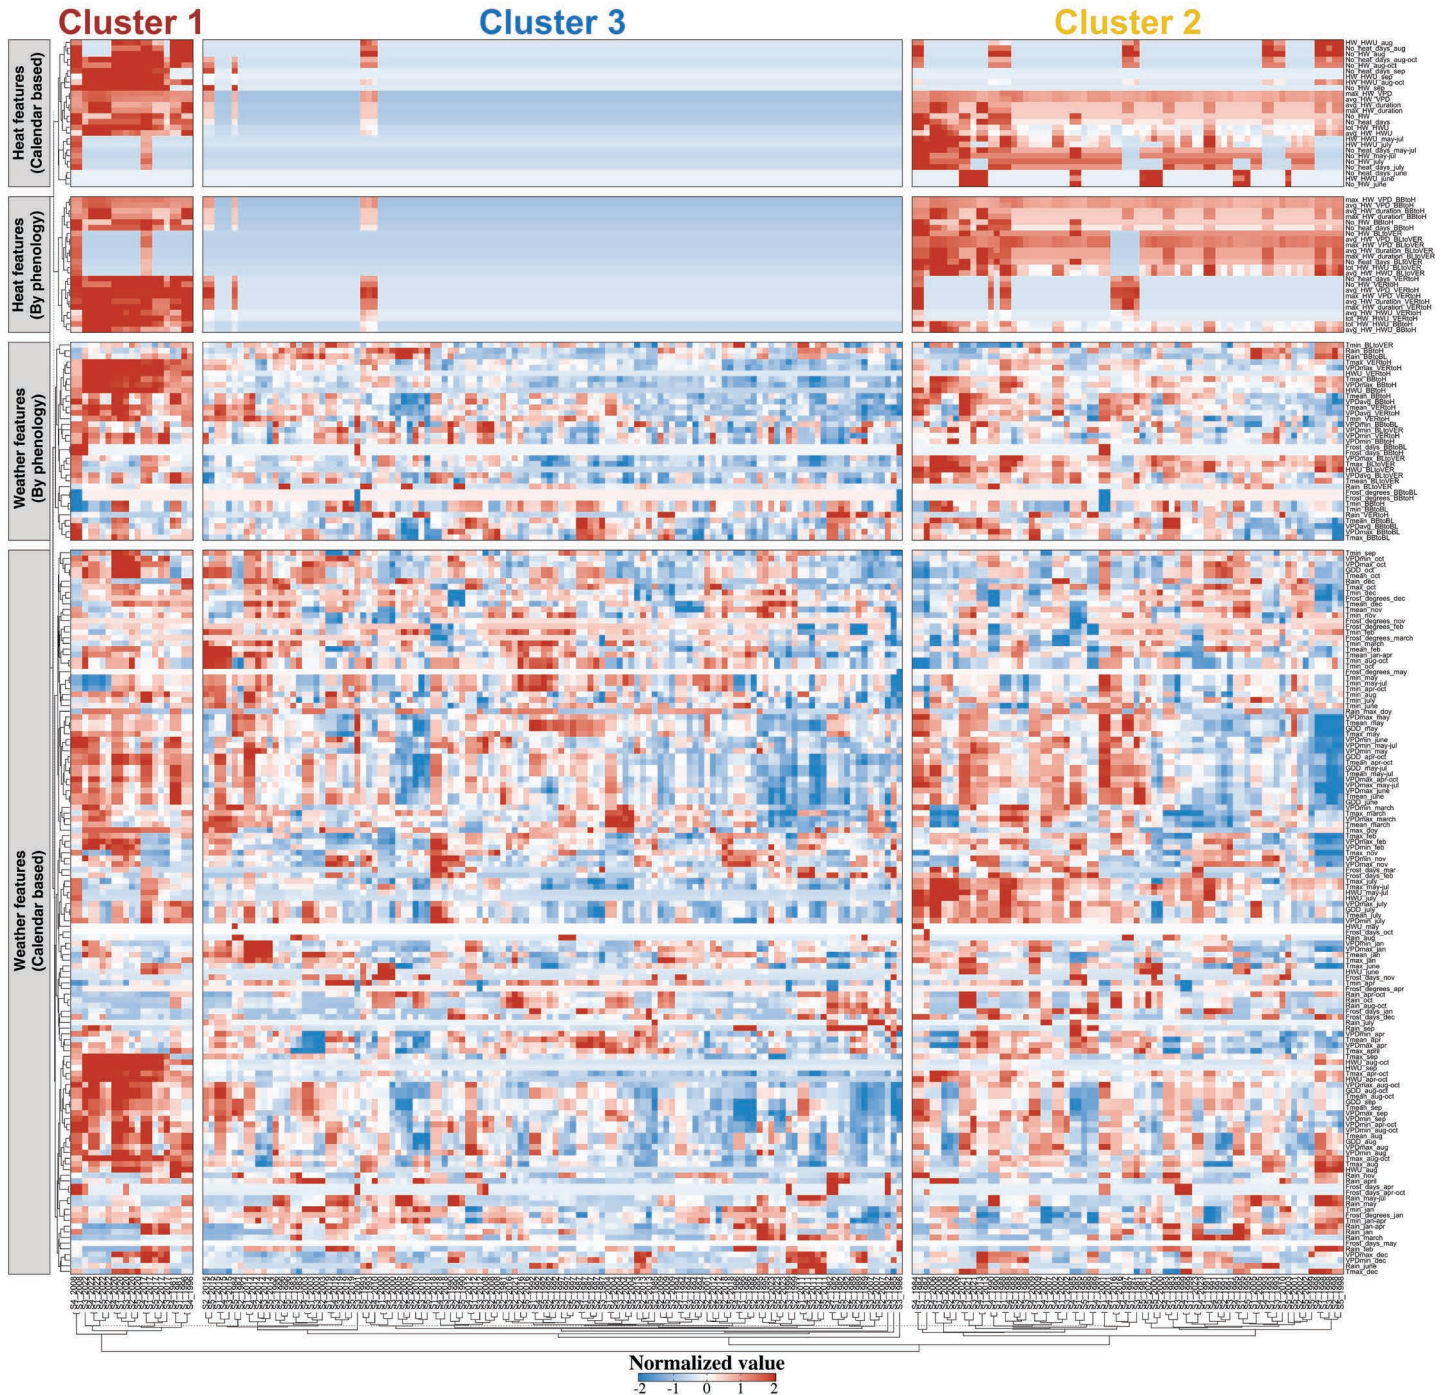

**Supplemental Figure 3** Heatmap of scaled historical weather data submitted to clustering analysis. Columns represent combinations of a vineyard site (S1 to S5) and season (1981 to 2023), rows show normalized values (mean = 0, standard deviation = 1) for each weather feature extracted from historical series. Dendrograms group rows and columns using hierarchical clustering analysis. Gray boxes represent categories of features (generic weather and heat-related) and specify whether growth stages were based on calendar days or phenological stages.

See additional Data Supplement for full-sized graphic.

## Supplemental Data for:

Previtali P, Giorgini F, Sanchez LA and Dokoozlian NK. 2026. Long-term weather observations reveal the impact of heatwaves on the yield and fruit composition of Cabernet Sauvignon. *Am J Enol Vitic* 77:0770001. DOI: 10.5344/ajev.2025.25017

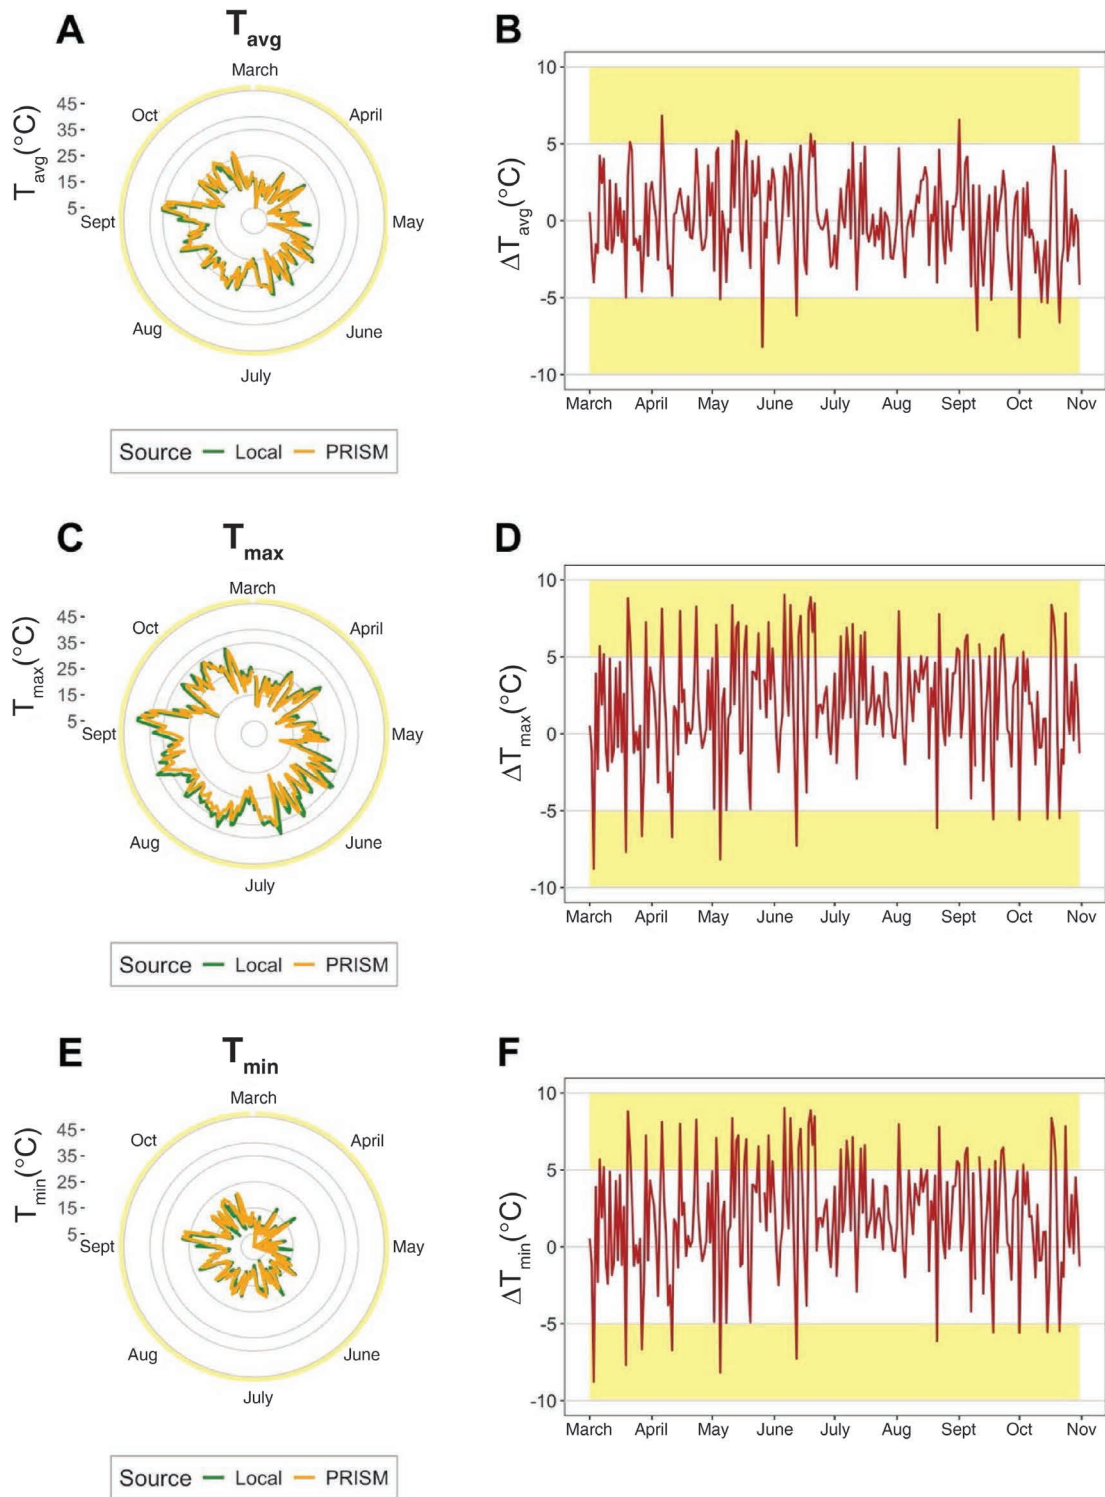

**Supplemental Figure 4** Comparison between daily temperature values from PRISM (gridded climate data) and a local weather station at one of the study sites (April to October): average ( $T_{avg}$ ; **A** and **B**), maximum ( $T_{max}$ ; **C** and **D**), and minimum temperature ( $T_{min}$ ; **E** and **F**). In **A**, **C**, and **E**, lines connect daily temperature values and colors differentiate between data sources. **B**, **D**, and **F** show daily differences between PRISM and local station data.

## Supplemental Data for:

Previtali P, Giorgini F, Sanchez LA and Dokoozlian NK. 2026. Long-term weather observations reveal the impact of heatwaves on the yield and fruit composition of Cabernet Sauvignon. *Am J Enol Vitic* 77:0770001. DOI: 10.5344/ajev.2025.25017

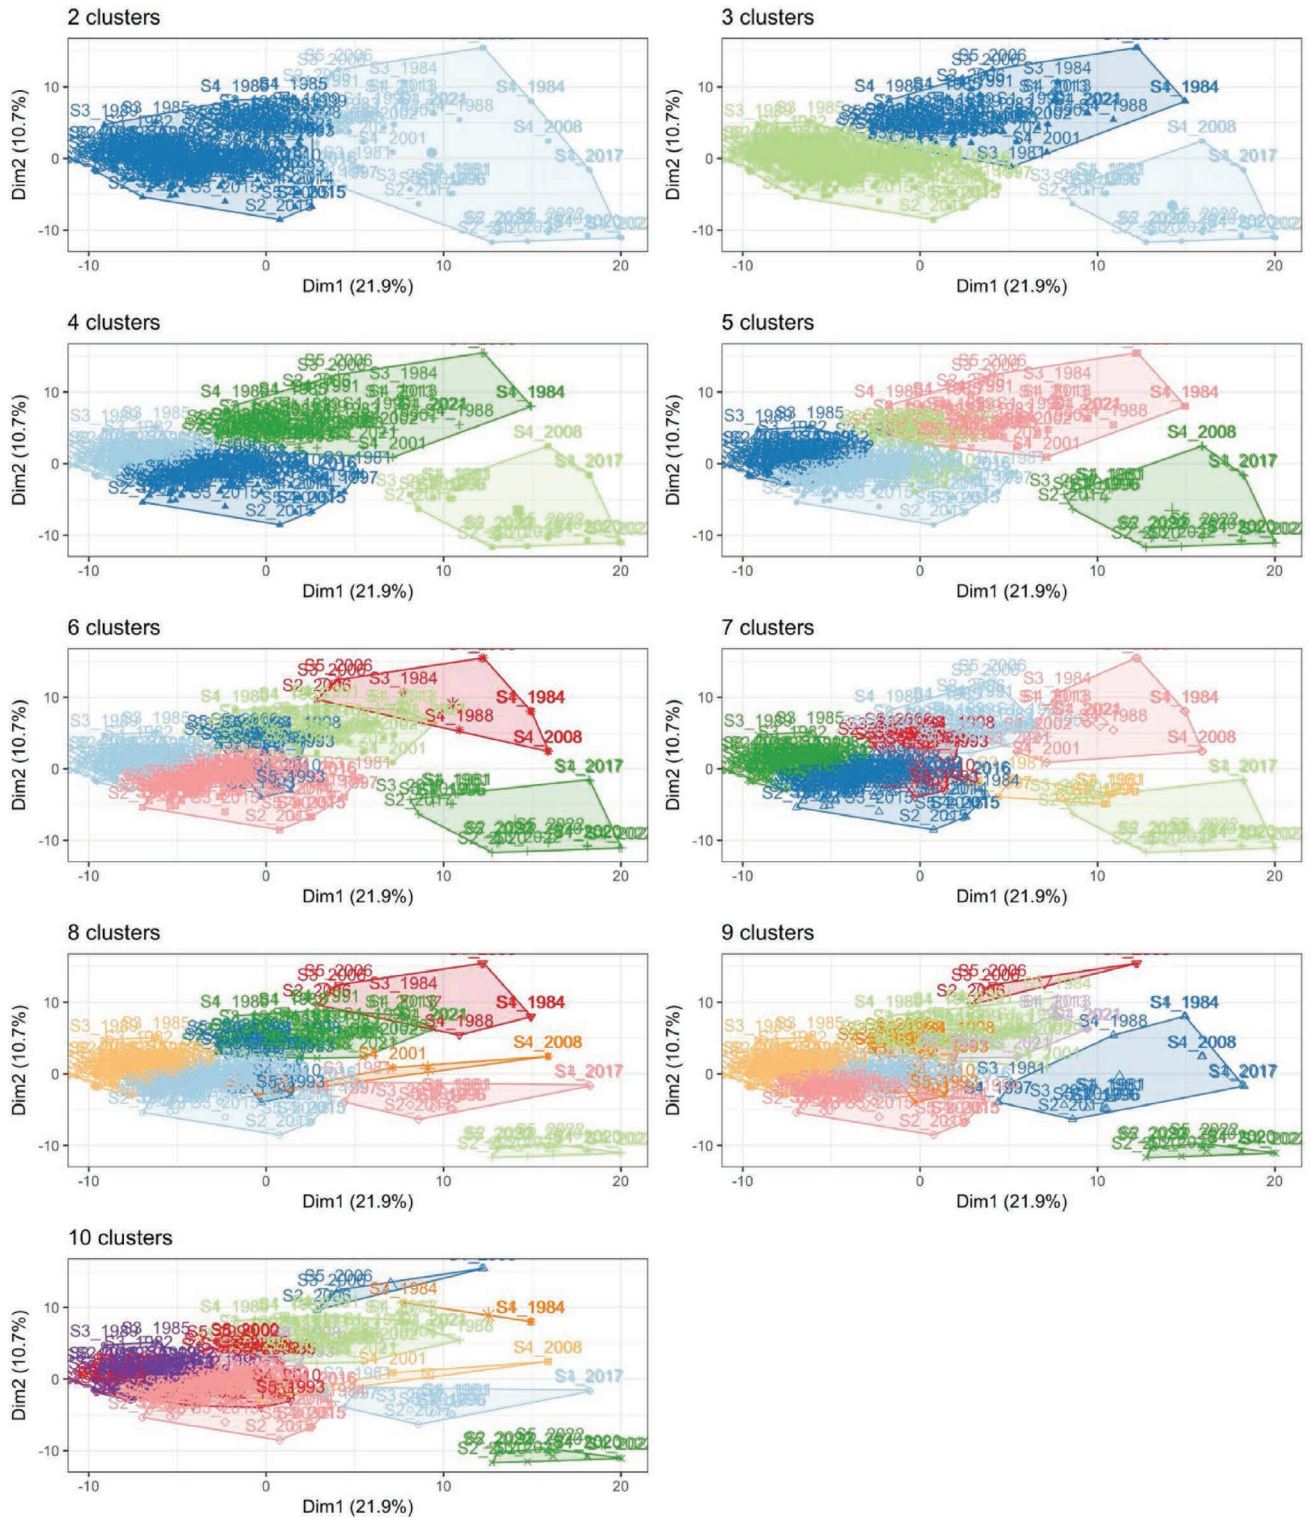

**Supplemental Figure 5** Hierarchical clustering analysis outputs by varying number of clusters from 2 to 10 clusters. The three-cluster solution was selected as the optimal number of clusters for further analysis.

## Supplemental Data for:

Previtali P, Giorgini F, Sanchez LA and Dokoozlian NK. 2026. Long-term weather observations reveal the impact of heatwaves on the yield and fruit composition of Cabernet Sauvignon. *Am J Enol Vitic* 77:0770001. DOI: 10.5344/ajev.2025.25017

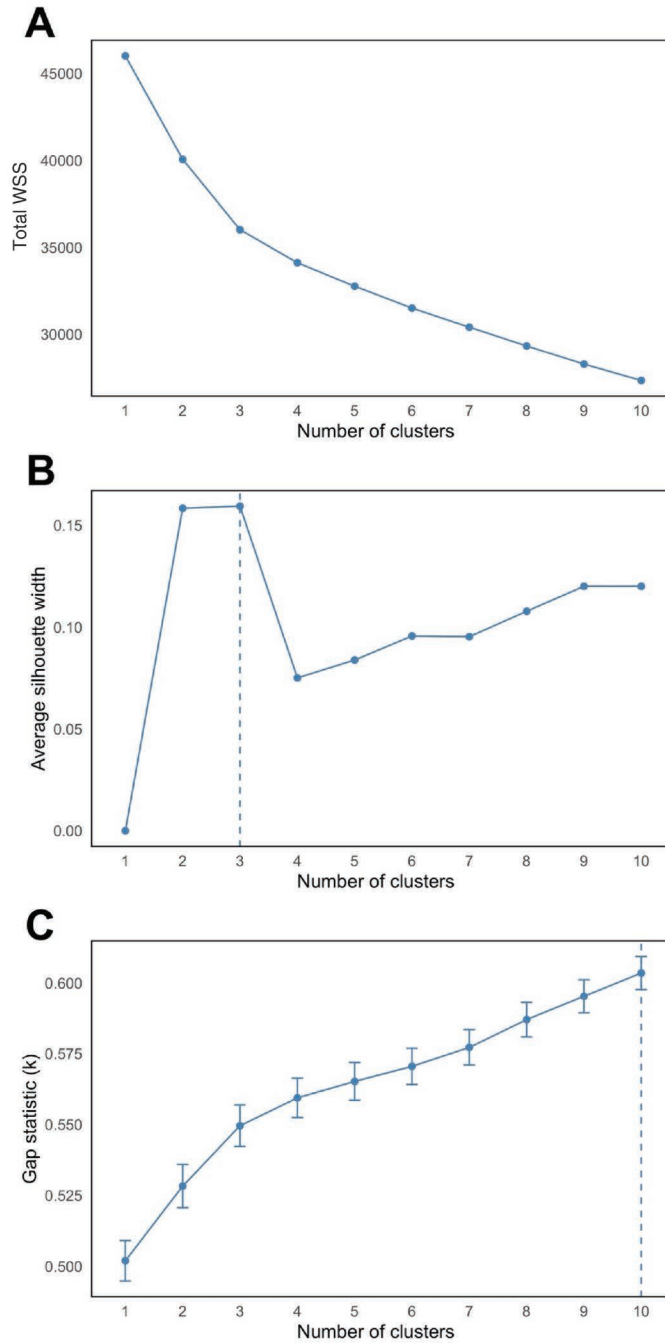

**Supplemental Figure 6** Hierarchical clustering analysis (HCA) optimization with clustering performance metrics. Three different indexes were assessed in response to varying number of clusters from 1 to 10: **A**) within sum of squares (WSS); **B**) silhouette width; **C**) gap statistic.

## Supplemental Data for:

Previtali P, Giorgini F, Sanchez LA and Dokoozlian NK. 2026. Long-term weather observations reveal the impact of heatwaves on the yield and fruit composition of Cabernet Sauvignon. *Am J Enol Vitic* 77:0770001. DOI: 10.5344/ajev.2025.25017

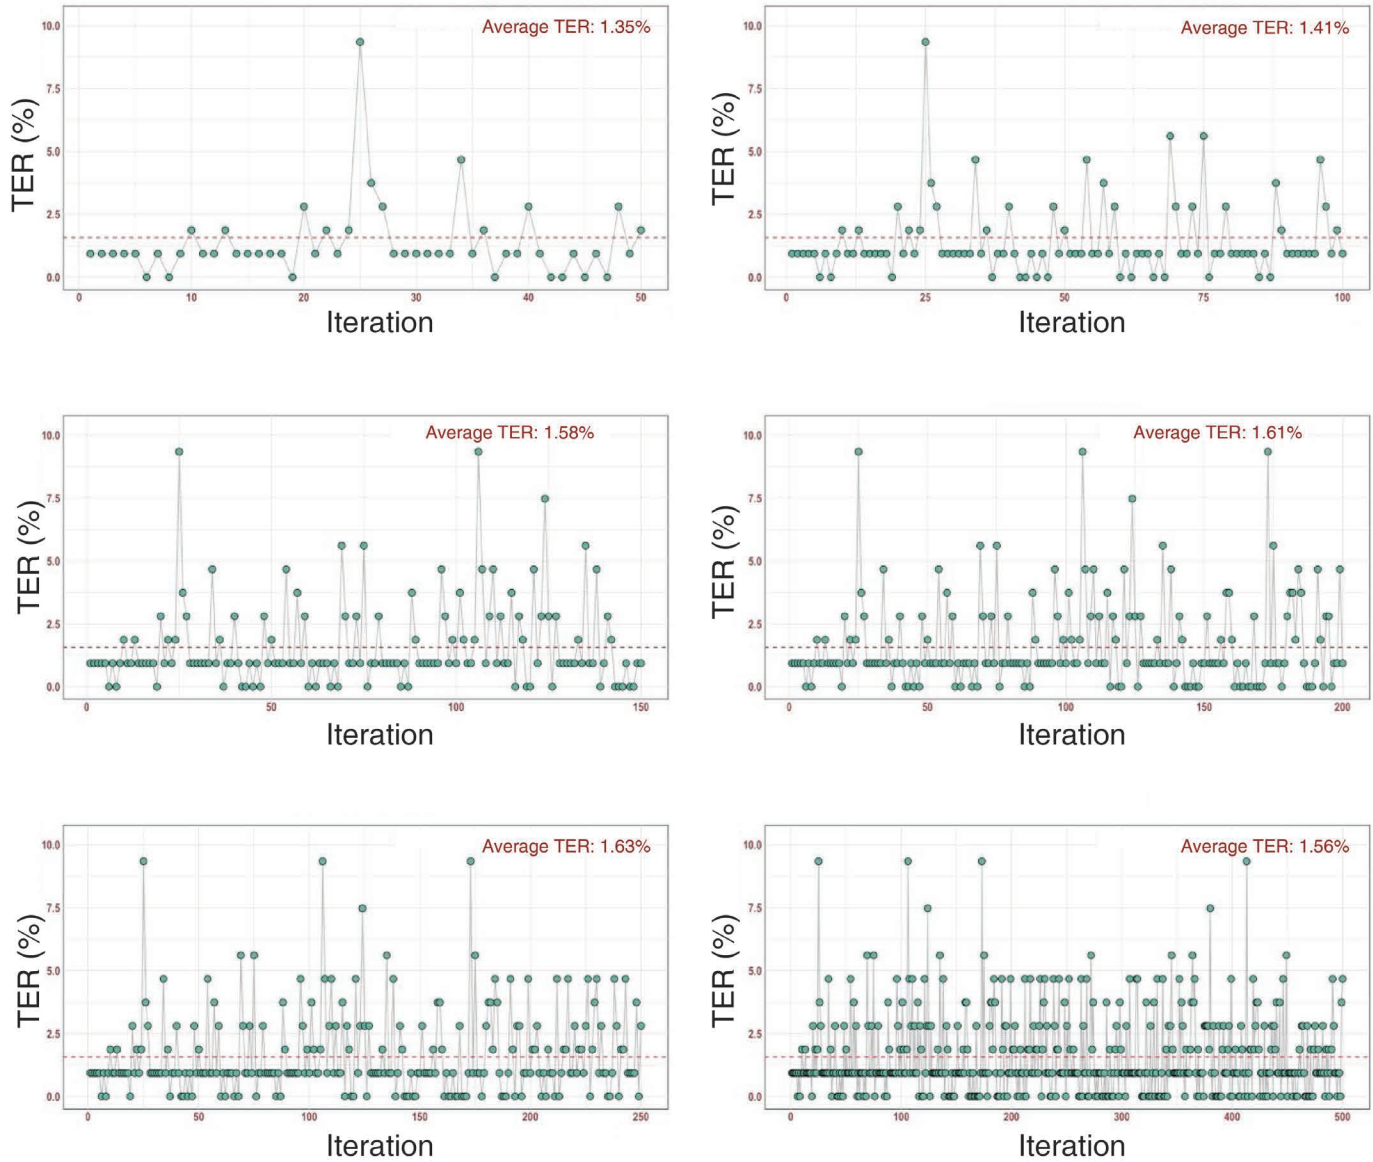

**Supplemental Figure 7** Cluster validation using iterative bootstrap random forest classification with three clusters. Each panel represents the test error rate (TER) for a given number of iterations, from 50 to 500. Green points represent TER values for each iteration. The red dashed line represents the average TER across all iterations, with the value annotated in red at the top of each graph.

## Supplemental Data for:

Previtali P, Giorgini F, Sanchez LA and Dokoozlian NK. 2026. Long-term weather observations reveal the impact of heatwaves on the yield and fruit composition of Cabernet Sauvignon. *Am J Enol Vitic* 77:0770001. DOI: 10.5344/ajev.2025.25017

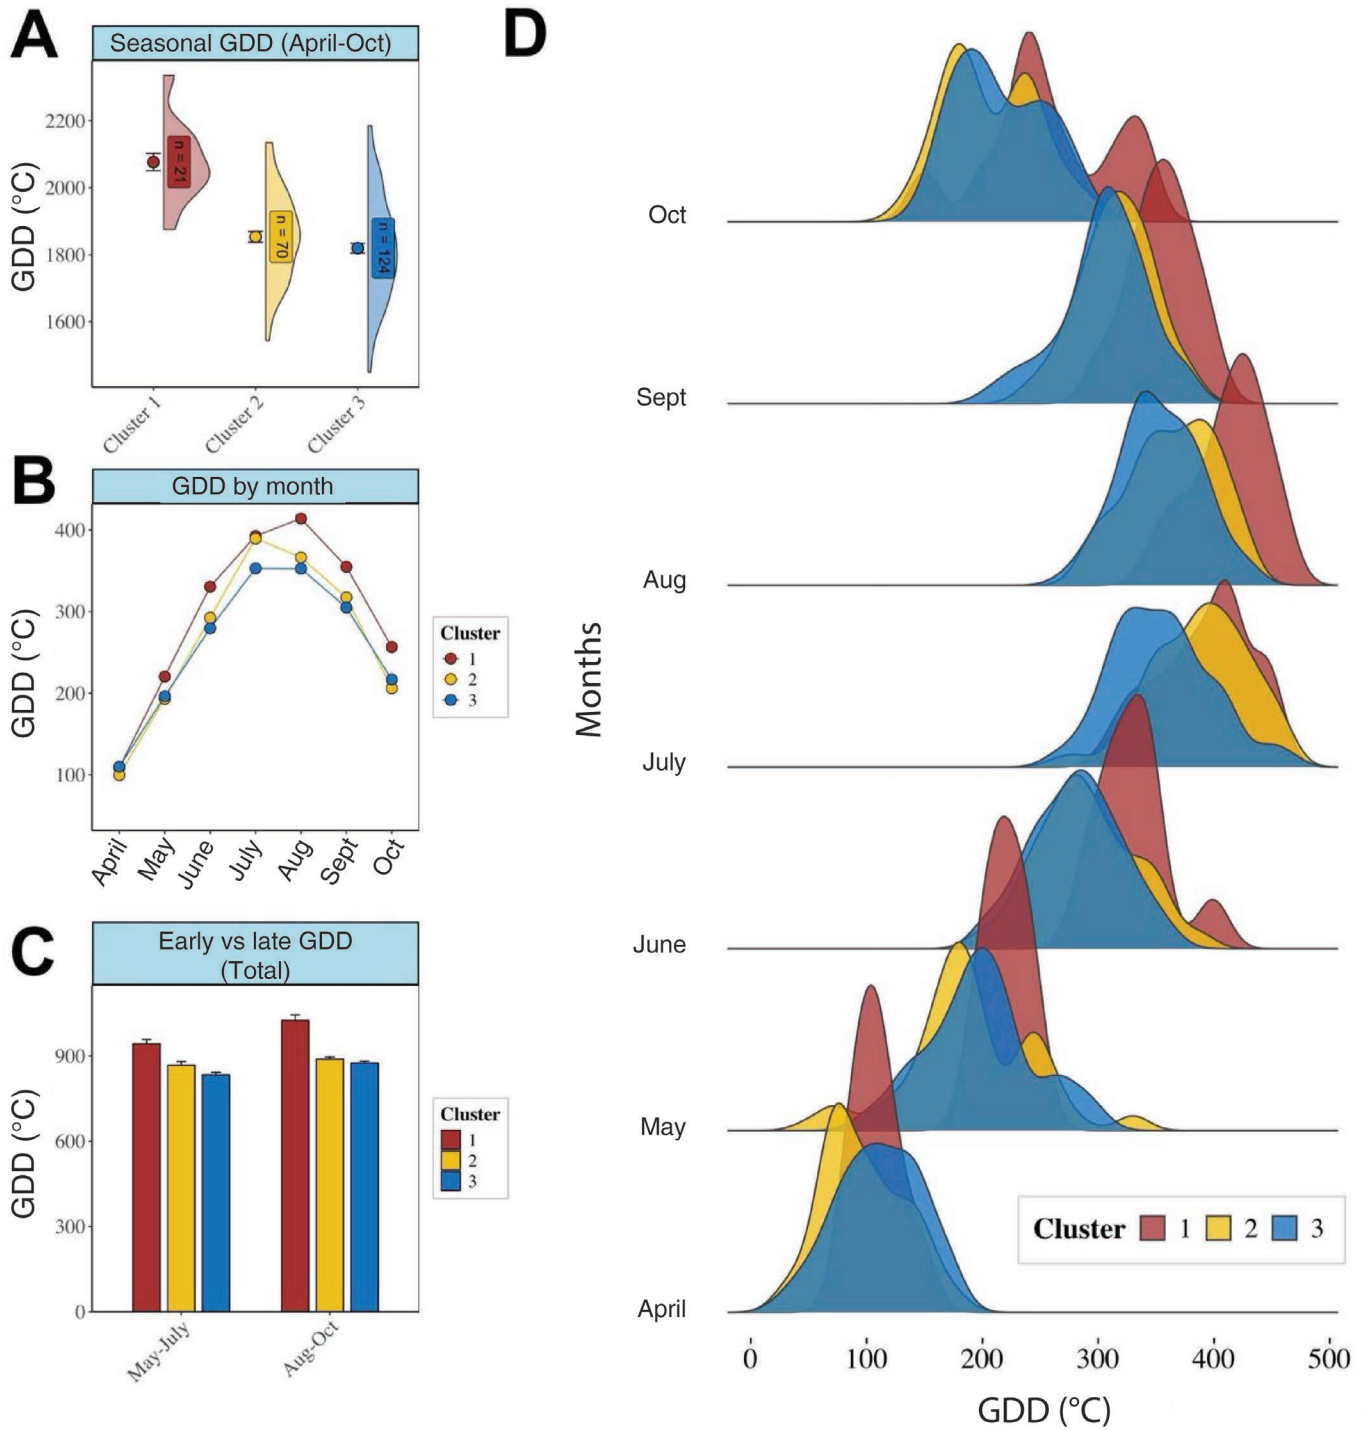

**Supplemental Figure 8** Growing degree day (GDD) features summarized by weather cluster. **A**) Distribution of total GDD (April to October) by cluster; **B**) monthly distribution of GDD averages by cluster; **C**) GDD by cluster early and late in the growing season; and **D**) monthly distribution of GDD values by cluster. Colors differentiate between clusters, indicating seasons with different heat levels: Cluster 1, postveraison heat; Cluster 2, preveraison heat; Cluster 3, cool seasons. When present, points and error bars represent means  $\pm$  standard error by cluster.

## Supplemental Data for:

Previtali P, Giorgini F, Sanchez LA and Dokoozlian NK. 2026. Long-term weather observations reveal the impact of heatwaves on the yield and fruit composition of Cabernet Sauvignon. *Am J Enol Vitic* 77:0770001. DOI: 10.5344/ajev.2025.25017

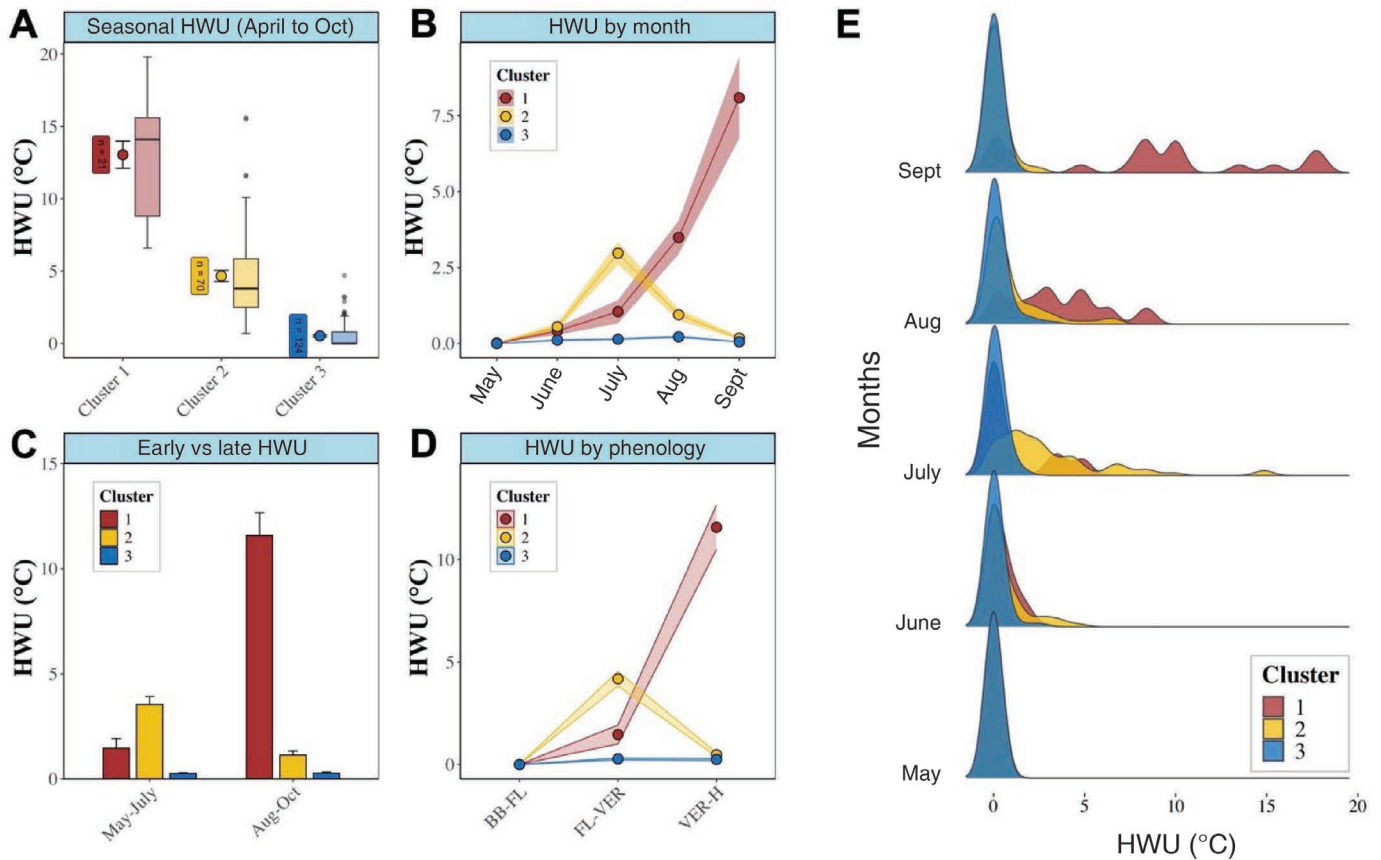

**Supplemental Figure 9** Heatwave unit (HWU) features summarized by weather cluster. HWU was calculated as the cumulative deviation of  $T_{max} - 38^{\circ}\text{C}$ , considering positive deviations only. **A**) Distribution of total HWU (April to October) by cluster; **B**) monthly distribution of HWU by cluster; **C**) HWU by cluster early (May to July) and late (August to October) in the growing season; **D**) summary of HWU by phenological stage (BB, budbreak; FL, flowering; VER, veraison; H, harvest); and **E**) monthly distribution of HWU values by cluster from May to October. Colors differentiate between clusters, indicating seasons with different heat levels: Cluster 1, postveraison; Cluster 2, preveraison heat; Cluster 3, cool seasons. When present, points and error bars represent means  $\pm$  standard error (SE) by cluster. Ribbons represent SE values in line charts.

## Supplemental Data for:

Previtali P, Giorgini F, Sanchez LA and Dokoozlian NK. 2026. Long-term weather observations reveal the impact of heatwaves on the yield and fruit composition of Cabernet Sauvignon. *Am J Enol Vitic* 77:0770001. DOI: 10.5344/ajev.2025.25017

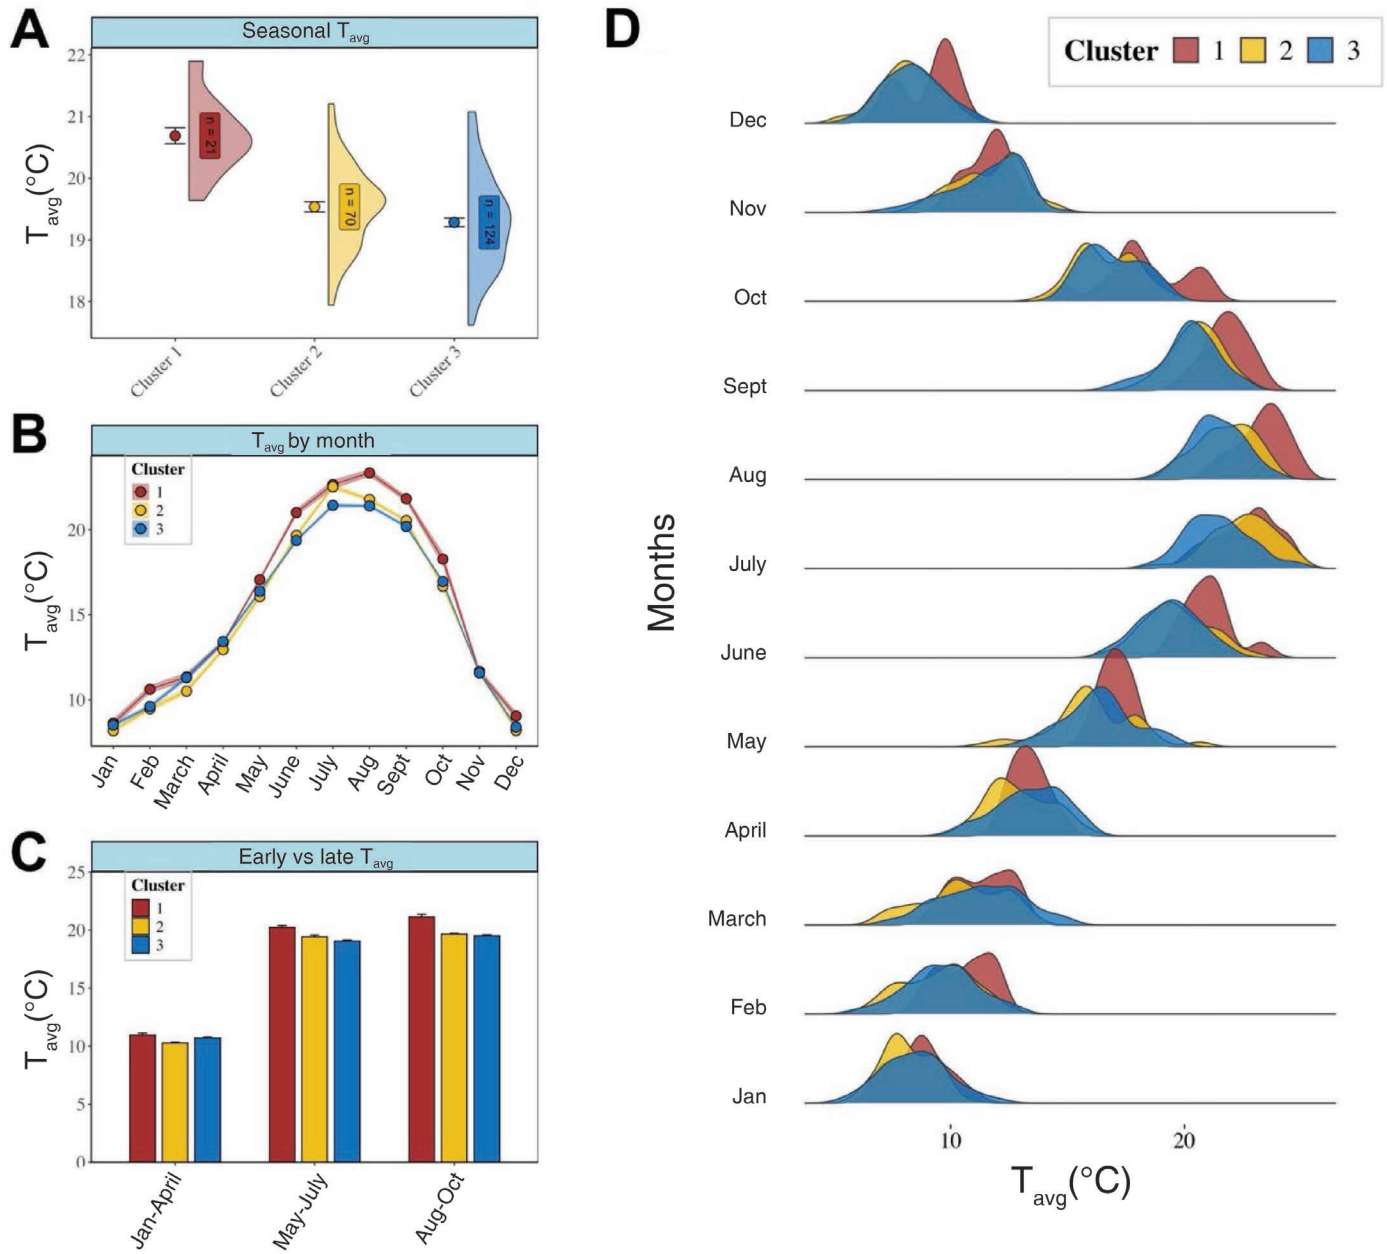

**Supplemental Figure 10** Average temperature ( $T_{avg}$ ) features summarized by weather cluster. **A**) Distribution of seasonal  $T_{avg}$  values by cluster (April to October); **B**) monthly distribution of  $T_{avg}$  values by cluster; **C**)  $T_{avg}$  values by cluster early (May to July) and late (August to October) in the growing season; and **D**) monthly distribution of  $T_{avg}$  values by cluster. Colors differentiate between clusters, indicating seasons with different heat levels: Cluster 1, post-veraison heat; Cluster 2, preveraison heat; Cluster 3, cool seasons. When present, points and error bars represent means  $\pm$  standard error (SE) by cluster. Ribbons represent SE values in line charts.

## Supplemental Data for:

Previtali P, Giorgini F, Sanchez LA and Dokoozlian NK. 2026. Long-term weather observations reveal the impact of heatwaves on the yield and fruit composition of Cabernet Sauvignon. *Am J Enol Vitic* 77:0770001. DOI: 10.5344/ajev.2025.25017

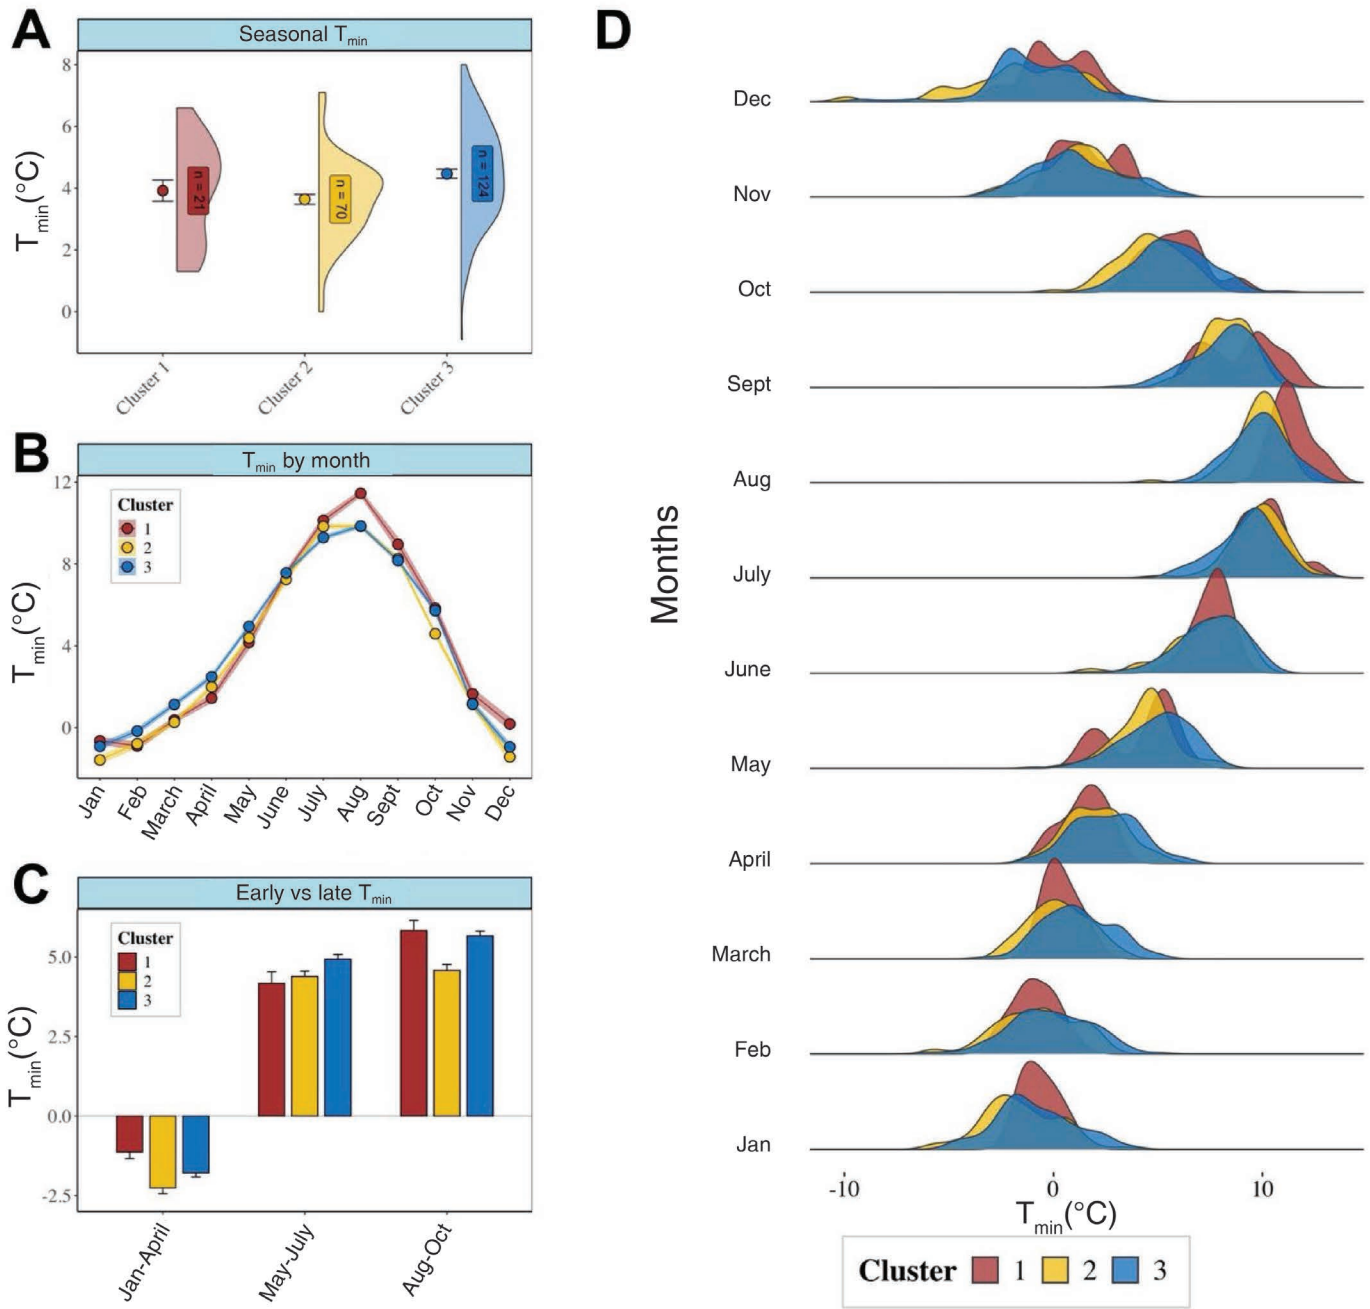

**Supplemental Figure 11** Minimum temperature ( $T_{min}$ ) features summarized by weather cluster. **A**) Distribution of seasonal  $T_{min}$  values by cluster (April to Oct); **B**) monthly distribution of  $T_{min}$  values by cluster; **C**)  $T_{min}$  values by cluster before the growing season (January to April) and early (May to July) and late (August to October) in the growing season; and **D**) monthly distribution of  $T_{min}$  values by cluster. Colors differentiate between clusters, indicating seasons with different heat levels: Cluster 1, postveraison heat; Cluster 2, preveraison heat; Cluster 3, cool seasons. When present, points and error bars represent means  $\pm$  standard error (SE) by cluster. Ribbons represent SE values in line charts.

## Supplemental Data for:

Previtali P, Giorgini F, Sanchez LA and Dokoozlian NK. 2026. Long-term weather observations reveal the impact of heatwaves on the yield and fruit composition of Cabernet Sauvignon. *Am J Enol Vitic* 77:0770001. DOI: 10.5344/ajev.2025.25017

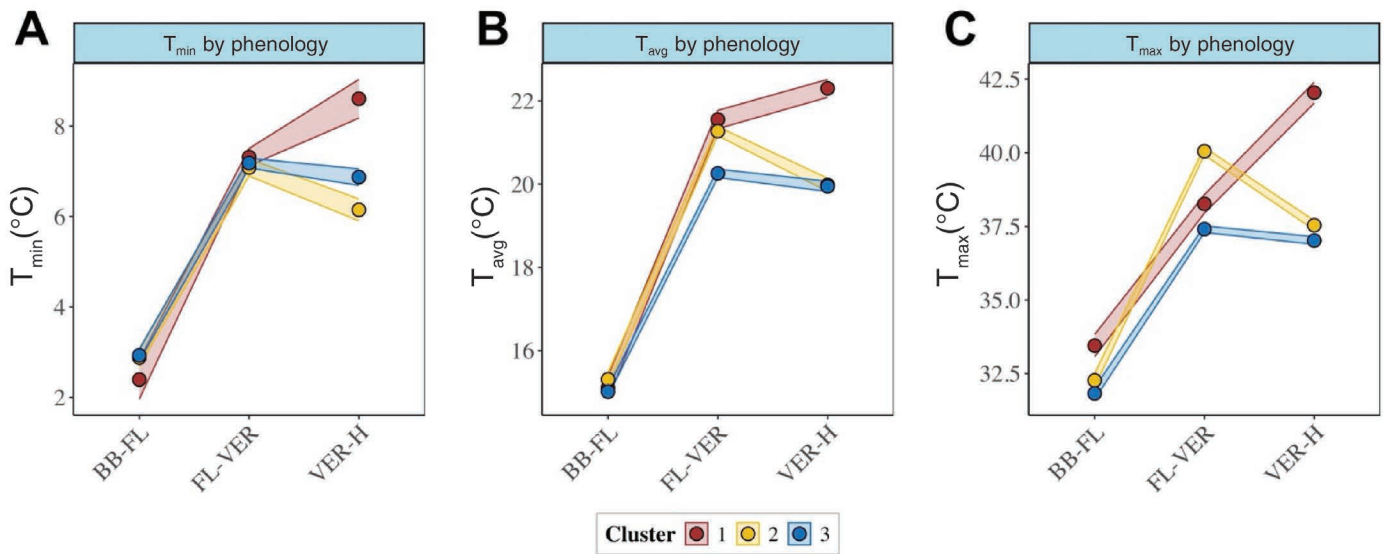

**Supplemental Figure 12** Changes in temperature by cluster according to phenological intervals (BB, budbreak; FL, flowering; VER, veraison; H, harvest). **A**) Minimum temperature ( $T_{\min}$ ), **B**) average temperature ( $T_{\text{avg}}$ ), and **C**) maximum temperature ( $T_{\text{max}}$ ). Points and ribbons represent means  $\pm$  standard error. Colors differentiate between clusters, indicating seasons with different heat levels: Cluster 1, postveraison heat; Cluster 2, preveraison heat; Cluster 3, cool seasons.

## Supplemental Data for:

Previtali P, Giorgini F, Sanchez LA and Dokoozlian NK. 2026. Long-term weather observations reveal the impact of heatwaves on the yield and fruit composition of Cabernet Sauvignon. *Am J Enol Vitic* 77:0770001. DOI: 10.5344/ajev.2025.25017

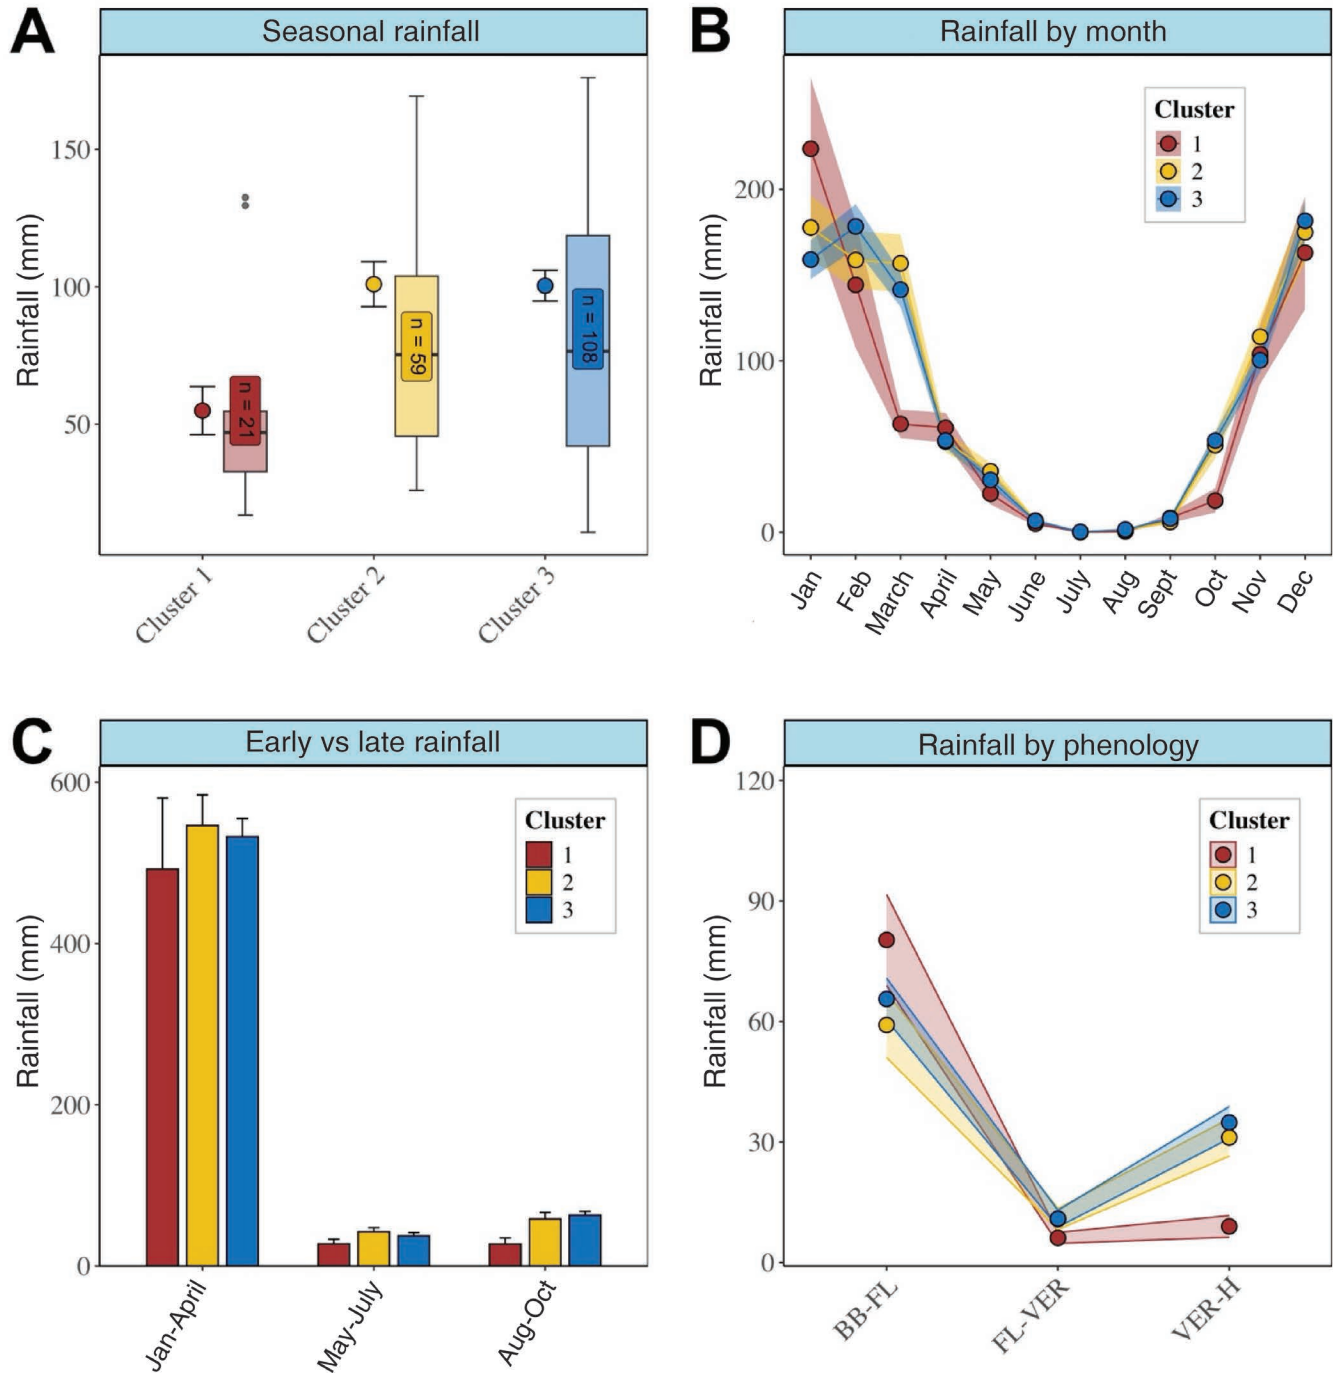

**Supplemental Figure 13** Rainfall features summarized by weather cluster. **A**) Distribution of seasonal rainfall by cluster (April to October); **B**) monthly distribution of rainfall by cluster; **C**) rainfall by cluster before the growing season (January to April) and early (May to July) and late (August to October) in the growing season; and **D**) rainfall by cluster according to phenological intervals (BB, budbreak; FL, flowering; VER, veraison; H, harvest). Colors differentiate between clusters, indicating seasons with different heat levels: Cluster 1, postveraison heat; Cluster 2, preveraison heat; Cluster 3, cool seasons. When present, points and error bars represent means  $\pm$  standard error (SE) by cluster. Ribbons represent SE values in line charts.

## Supplemental Data for:

Previtali P, Giorgini F, Sanchez LA and Dokoozlian NK. 2026. Long-term weather observations reveal the impact of heatwaves on the yield and fruit composition of Cabernet Sauvignon. *Am J Enol Vitic* 77:0770001. DOI: 10.5344/ajev.2025.25017

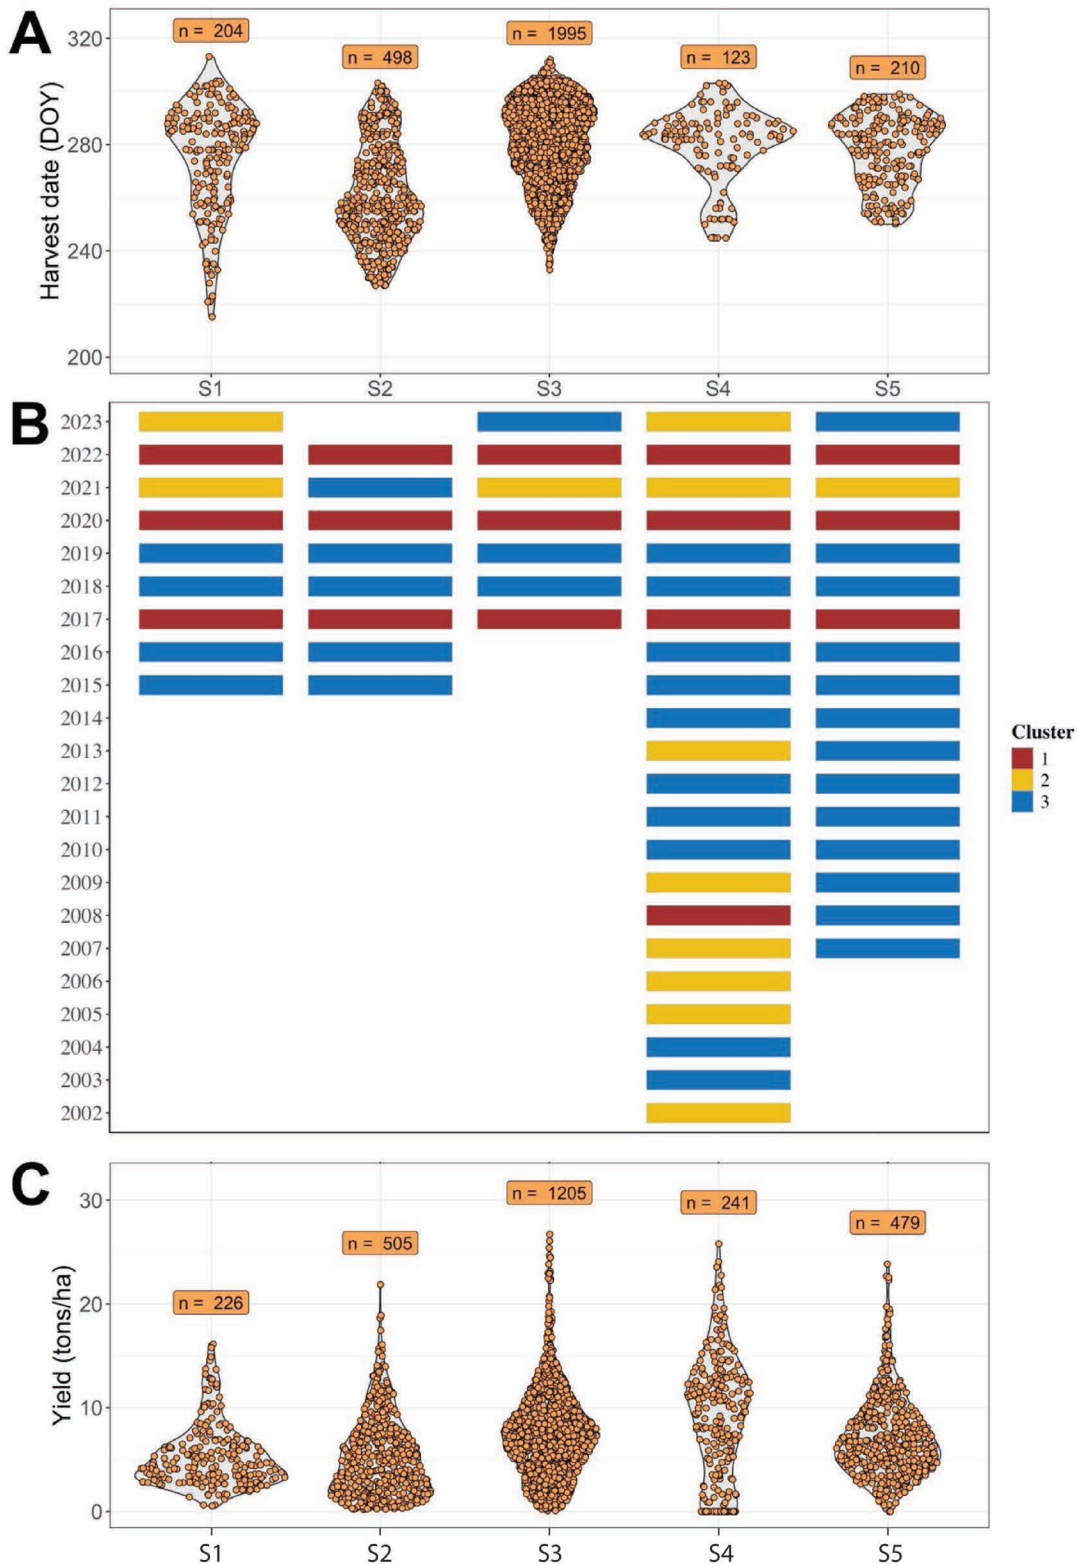

**Supplemental Figure 14** Exploratory analysis of harvest date (**A**) and yield (**C**) and cluster classification of seasons at the five sites (S1 to S5). In **A** and **C**, points represent data available at each site, with the number of observations by site annotated above the data distributions. In **B**, colors differentiate between clusters, indicating seasons with different heat levels: Cluster 1, postveraison heat; Cluster 2, preveraison heat; Cluster 3, cool seasons. DOY, day of year.

## Supplemental Data for:

Previtali P, Giorgini F, Sanchez LA and Dokoozlian NK. 2026. Long-term weather observations reveal the impact of heatwaves on the yield and fruit composition of Cabernet Sauvignon. *Am J Enol Vitic* 77:0770001. DOI: 10.5344/ajev.2025.25017

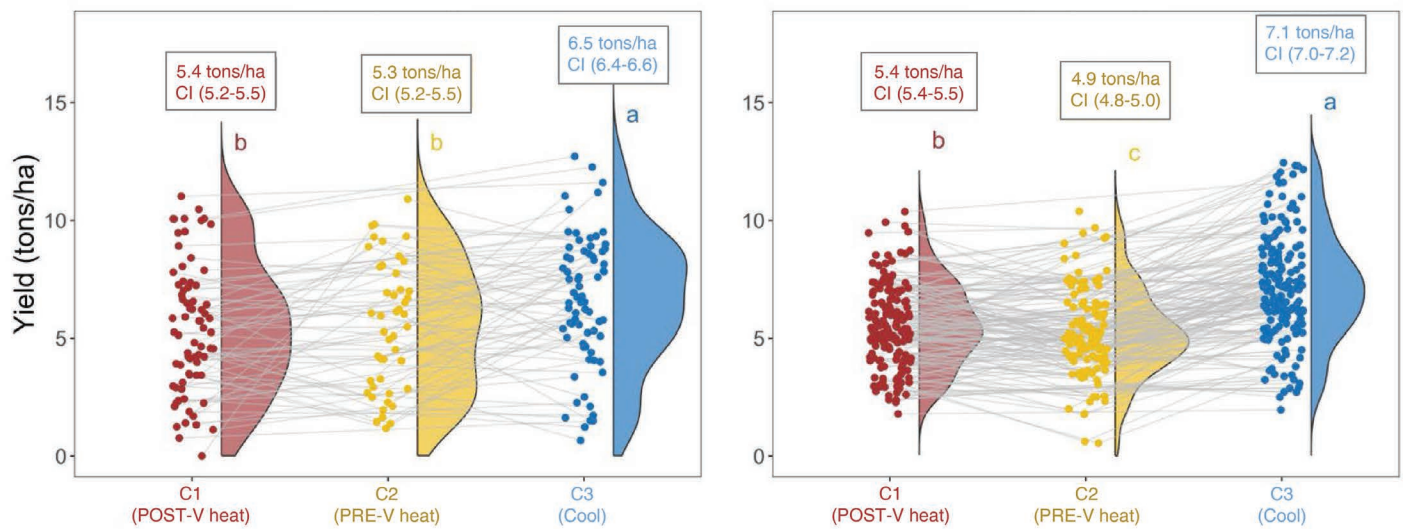

**Supplemental Figure 15** Effect of weather clusters on Cabernet Sauvignon yield, according to vineyard age. The same analysis was repeated after classifying vineyard blocks as young (3 to 5 yr, left graph) or mature (>5 yr, right graph). Points represent average yield for individual blocks summarized by cluster. Colors differentiate between clusters: Cluster 1 (C1; POST-V, postveraison heat), Cluster 2 (C2; PRE-V, preveraison heat), and Cluster 3 (C3; Cool, cool season). Gray lines connect averages for the same vineyard block belonging to different clusters. Density plots represent distributions by cluster for each age group. Labels report cluster means and 95% confidence intervals (CI) by group, calculated using a linear mixed model where clusters were the fixed effect and vineyard blocks were the random effect on the model intercept. Different letters denote statistical differences between clusters for each age group according to Tukey's adjusted multiple comparison post-hoc test with  $\alpha \leq 0.05$ .

## Supplemental Data for:

Previtali P, Giorgini F, Sanchez LA and Dokoozlian NK. 2026. Long-term weather observations reveal the impact of heatwaves on the yield and fruit composition of Cabernet Sauvignon. *Am J Enol Vitic* 77:0770001. DOI: 10.5344/ajev.2025.25017

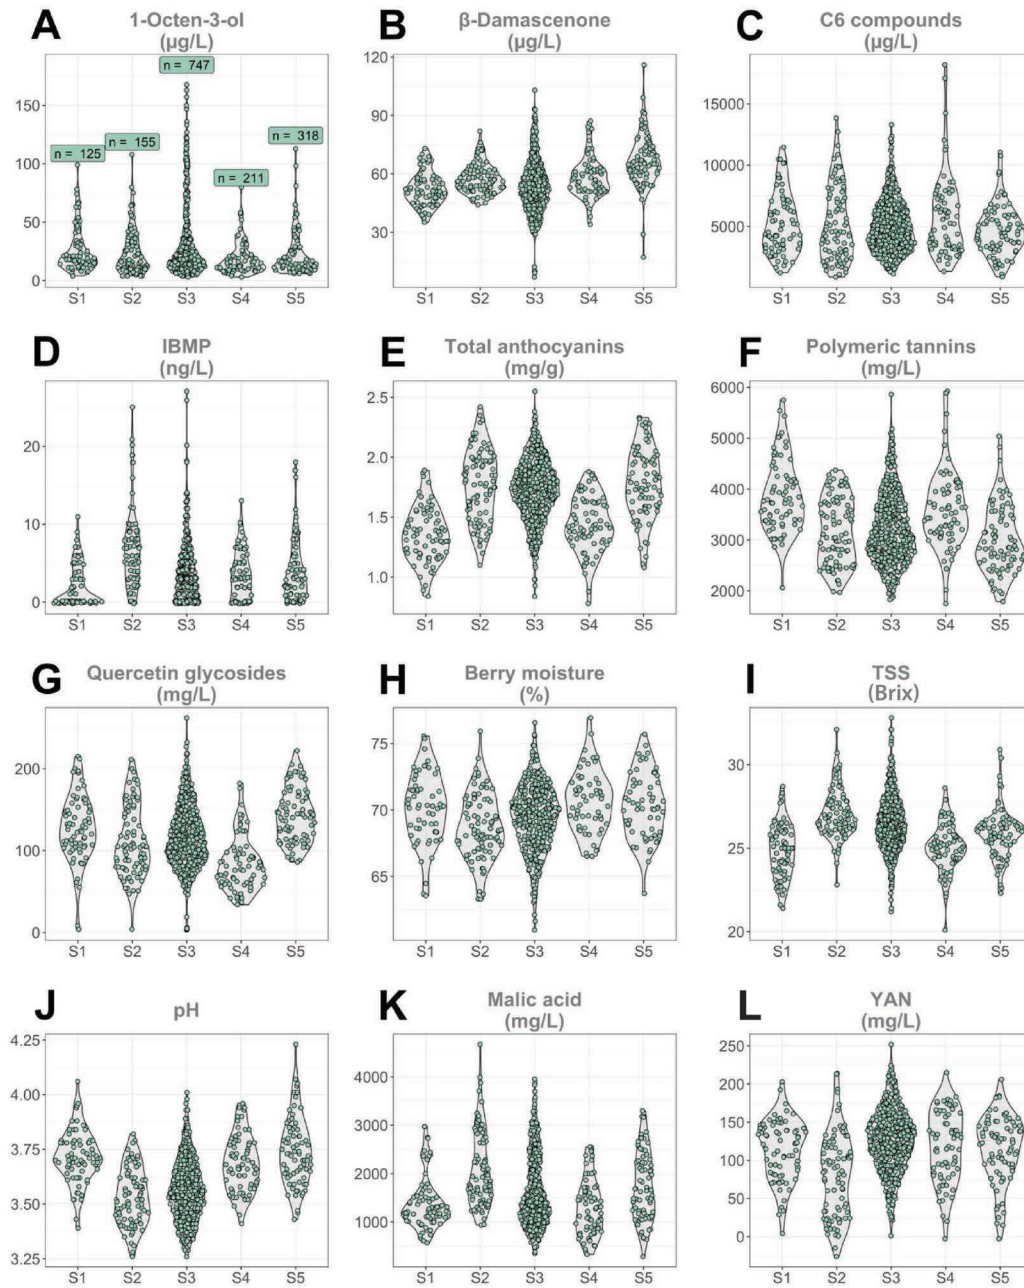

**Supplemental Figure 16** Exploratory analysis of grape analytes measured at five different sites. **A to L** represent single fruit composition parameters and points represent data available for each site (S1 to S5). The number of observations by site is annotated on top of data distributions in the first plot only. IBMP, 3-isobutyl-2-methoxypyrazine; TSS, total soluble solids; YAN, yeast assimilable nitrogen.
